# Supplementary material for: Exploring the underlying mechanisms of Hedyotis diffusa and Scutellaria barbata herb pair on the prognosis and treatment efficacy of bladder cancer patients: an integrated approach of network pharmacology and bioinformatics analysis
Source: Research Square preprint supplement (doi:10.21203/rs.3.rs-6732285/v1), 2025-07-14
Supplement: Supplementary file 1 [file 5cbf5fee4a5861a1cb79e69e.xlsx]

## Sheet: Sheet 1
ID	coef	se	z	p	HR	HRse	HRz	HRp	HRCILL	HRCIUL
WASH7P	-0.416	0.153	-2.716	0.007	0.66	0.101	-3.368	0.001	0.489	0.891
WASH9P	-0.401	0.153	-2.617	0.009	0.67	0.103	-3.219	0.001	0.496	0.904
AL390719.1	-0.454	0.153	-2.969	0.003	0.635	0.097	-3.758	0	0.47	0.857
C1orf159	-0.443	0.153	-2.892	0.004	0.642	0.098	-3.638	0	0.476	0.867
AL390719.2	-0.395	0.152	-2.594	0.009	0.674	0.103	-3.181	0.001	0.5	0.908
TNFRSF14-AS1	-0.661	0.156	-4.243	0	0.516	0.08	-6.013	0	0.381	0.701
TNFRSF14	-0.548	0.154	-3.566	0	0.578	0.089	-4.748	0	0.428	0.781
AL139246.2	-0.421	0.152	-2.761	0.006	0.656	0.1	-3.433	0.001	0.487	0.885
TTC34	-0.412	0.152	-2.704	0.007	0.662	0.101	-3.346	0.001	0.491	0.893
DFFB	-0.428	0.152	-2.817	0.005	0.652	0.099	-3.517	0	0.484	0.878
ICMT	0.402	0.153	2.619	0.009	1.494	0.229	2.157	0.031	1.106	2.018
ENO1	0.418	0.153	2.743	0.006	1.519	0.232	2.242	0.025	1.127	2.049
AL357140.2	-0.483	0.154	-3.147	0.002	0.617	0.095	-4.046	0	0.457	0.833
AL109811.2	-0.436	0.153	-2.856	0.004	0.646	0.099	-3.581	0	0.479	0.872
PLOD1	0.525	0.153	3.425	0.001	1.69	0.259	2.665	0.008	1.252	2.282
TMEM51	-0.419	0.155	-2.705	0.007	0.658	0.102	-3.359	0.001	0.486	0.891
FHAD1	-0.403	0.154	-2.62	0.009	0.668	0.103	-3.227	0.001	0.494	0.903
AL031283.1	-0.466	0.154	-3.023	0.003	0.627	0.097	-3.851	0	0.464	0.849
EFHD2	-0.451	0.155	-2.916	0.004	0.637	0.099	-3.686	0	0.47	0.862
CASP9	-0.427	0.154	-2.775	0.006	0.653	0.1	-3.461	0.001	0.483	0.882
AL121992.3	-0.479	0.153	-3.141	0.002	0.619	0.094	-4.031	0	0.459	0.835
HSPB7	0.568	0.155	3.658	0	1.765	0.274	2.791	0.005	1.302	2.393
AL137798.1	-0.459	0.153	-3.002	0.003	0.632	0.097	-3.81	0	0.468	0.853
CROCCP2	-0.417	0.152	-2.738	0.006	0.659	0.1	-3.397	0.001	0.489	0.888
MST1L	-0.469	0.154	-3.039	0.002	0.626	0.096	-3.877	0	0.463	0.847
BX284668.6	-0.569	0.154	-3.687	0	0.566	0.087	-4.968	0	0.418	0.766
PLA2G2F	-0.511	0.155	-3.298	0.001	0.6	0.093	-4.304	0	0.443	0.813
HSPG2	0.552	0.154	3.581	0	1.736	0.268	2.752	0.006	1.284	2.349
LINC01355	-0.497	0.153	-3.243	0.001	0.608	0.093	-4.2	0	0.451	0.822
ZNF436-AS1	-0.512	0.153	-3.344	0.001	0.599	0.092	-4.367	0	0.444	0.809
PNRC2	-0.565	0.153	-3.685	0	0.568	0.087	-4.954	0	0.421	0.767
RSRP1	-0.444	0.152	-2.914	0.004	0.642	0.098	-3.669	0	0.476	0.865
AL031432.3	-0.413	0.153	-2.691	0.007	0.662	0.102	-3.331	0.001	0.49	0.894
CATSPER4	-0.506	0.153	-3.298	0.001	0.603	0.093	-4.293	0	0.446	0.814
RPS6KA1	-0.439	0.154	-2.855	0.004	0.645	0.099	-3.584	0	0.477	0.871
OSTCP2	-0.505	0.153	-3.298	0.001	0.603	0.092	-4.291	0	0.447	0.815
YTHDF2	-0.418	0.153	-2.734	0.006	0.659	0.101	-3.394	0.001	0.488	0.888
OPRD1	-0.411	0.152	-2.711	0.007	0.663	0.101	-3.354	0.001	0.492	0.892
SPOCD1	-0.502	0.154	-3.263	0.001	0.606	0.093	-4.238	0	0.448	0.818
PTP4A2	-0.404	0.152	-2.66	0.008	0.667	0.101	-3.278	0.001	0.495	0.899
FAM229A	-0.443	0.153	-2.886	0.004	0.642	0.099	-3.631	0	0.475	0.868
AL031602.1	-0.513	0.153	-3.357	0.001	0.599	0.091	-4.385	0	0.444	0.808
AL662907.1	-0.399	0.153	-2.601	0.009	0.671	0.103	-3.196	0.001	0.497	0.906
TRIM62	-0.41	0.153	-2.678	0.007	0.664	0.102	-3.311	0.001	0.491	0.896
COL8A2	0.447	0.155	2.881	0.004	1.564	0.243	2.323	0.02	1.154	2.12
HEYL	0.437	0.153	2.855	0.004	1.548	0.237	2.313	0.021	1.147	2.09
MFSD2A	-0.45	0.154	-2.922	0.003	0.638	0.098	-3.69	0	0.472	0.862
P3H1	0.446	0.154	2.896	0.004	1.562	0.24	2.337	0.019	1.155	2.111
HYI	-0.538	0.154	-3.486	0	0.584	0.09	-4.618	0	0.431	0.79
AL358075.2	-0.498	0.153	-3.248	0.001	0.608	0.093	-4.21	0	0.45	0.821
BEND5	-0.524	0.154	-3.406	0.001	0.592	0.091	-4.476	0	0.438	0.801
AC104170.1	-0.417	0.153	-2.723	0.006	0.659	0.101	-3.379	0.001	0.488	0.89
PCSK9	0.453	0.153	2.96	0.003	1.573	0.241	2.38	0.017	1.165	2.124
LINC01767	-0.536	0.155	-3.458	0.001	0.585	0.091	-4.575	0	0.432	0.793
JUN	0.404	0.153	2.643	0.008	1.497	0.229	2.175	0.03	1.11	2.02
NFIA	0.547	0.154	3.542	0	1.727	0.267	2.729	0.006	1.276	2.337
NFIA-AS2	0.59	0.155	3.81	0	1.805	0.28	2.878	0.004	1.332	2.445
KANK4	0.489	0.154	3.177	0.001	1.63	0.251	2.513	0.012	1.206	2.204
GNG12	0.4	0.153	2.614	0.009	1.492	0.229	2.154	0.031	1.105	2.015
WLS	0.4	0.152	2.623	0.009	1.491	0.227	2.162	0.031	1.106	2.01
PTGER3	0.456	0.155	2.935	0.003	1.578	0.245	2.357	0.018	1.164	2.139
ZRANB2	-0.412	0.152	-2.705	0.007	0.663	0.101	-3.346	0.001	0.492	0.893
NEGR1	0.51	0.154	3.307	0.001	1.665	0.257	2.591	0.01	1.231	2.252
ST6GALNAC3	0.433	0.153	2.838	0.005	1.542	0.235	2.303	0.021	1.143	2.08
AC103591.3	-0.435	0.154	-2.823	0.005	0.648	0.1	-3.536	0	0.479	0.876
ADGRL4	0.422	0.153	2.767	0.006	1.525	0.233	2.257	0.024	1.131	2.057
TTLL7	0.471	0.153	3.078	0.002	1.602	0.245	2.455	0.014	1.187	2.163
AL078459.1	-0.425	0.152	-2.788	0.005	0.654	0.1	-3.474	0.001	0.485	0.881
CLCA4-AS1	-0.47	0.153	-3.07	0.002	0.625	0.096	-3.918	0	0.463	0.844
ZNF326	-0.397	0.152	-2.61	0.009	0.673	0.102	-3.204	0.001	0.499	0.906
BRDT	-0.429	0.153	-2.813	0.005	0.651	0.099	-3.514	0	0.483	0.878
AC104836.1	-0.401	0.152	-2.636	0.008	0.67	0.102	-3.243	0.001	0.497	0.902
CNN3	0.41	0.153	2.672	0.008	1.507	0.231	2.192	0.028	1.115	2.036
S1PR1	0.462	0.152	3.032	0.002	1.587	0.242	2.428	0.015	1.177	2.14
AMY2B	-0.418	0.153	-2.734	0.006	0.658	0.101	-3.394	0.001	0.488	0.888
SLC6A17	0.441	0.155	2.853	0.004	1.554	0.24	2.307	0.021	1.148	2.104
OVGP1	-0.501	0.154	-3.256	0.001	0.606	0.093	-4.227	0	0.448	0.819
UBE2FP3	-0.406	0.153	-2.656	0.008	0.667	0.102	-3.276	0.001	0.494	0.899
OLFML3	0.405	0.154	2.625	0.009	1.499	0.231	2.158	0.031	1.108	2.029
TSPAN2	0.422	0.153	2.763	0.006	1.526	0.233	2.253	0.024	1.131	2.059
CASQ2	0.63	0.155	4.062	0	1.878	0.291	3.013	0.003	1.386	2.546
HSD3B1	-0.417	0.153	-2.721	0.007	0.659	0.101	-3.376	0.001	0.488	0.89
GAPDHP32	-0.402	0.153	-2.631	0.009	0.669	0.102	-3.238	0.001	0.496	0.903
CD160	-0.5	0.153	-3.275	0.001	0.606	0.093	-4.25	0	0.45	0.818
NBPF12	-0.413	0.152	-2.715	0.007	0.662	0.101	-3.361	0.001	0.491	0.892
ACP6	-0.449	0.153	-2.924	0.003	0.639	0.098	-3.69	0	0.473	0.863
LINC02804	-0.428	0.153	-2.8	0.005	0.652	0.1	-3.495	0	0.483	0.88
NBPF11	-0.471	0.153	-3.077	0.002	0.624	0.096	-3.931	0	0.462	0.843
AC245100.2	-0.496	0.153	-3.24	0.001	0.609	0.093	-4.193	0	0.451	0.822
AC242842.1	-0.613	0.154	-3.971	0	0.542	0.084	-5.482	0	0.4	0.733
ECM1	0.51	0.154	3.308	0.001	1.665	0.257	2.591	0.01	1.231	2.252
MLLT11	0.408	0.153	2.668	0.008	1.504	0.23	2.191	0.028	1.114	2.029
AL589765.1	-0.423	0.154	-2.749	0.006	0.655	0.101	-3.421	0.001	0.485	0.886
RIIAD1	-0.414	0.152	-2.719	0.007	0.661	0.101	-3.369	0.001	0.49	0.891
TCHH	0.509	0.154	3.298	0.001	1.663	0.256	2.585	0.01	1.229	2.249
RPTN	0.413	0.153	2.706	0.007	1.511	0.23	2.217	0.027	1.121	2.038
SPRR2F	0.455	0.153	2.976	0.003	1.576	0.241	2.391	0.017	1.168	2.127
AL162258.2	-0.589	0.156	-3.782	0	0.555	0.086	-5.151	0	0.409	0.753
CRTC2	-0.454	0.154	-2.951	0.003	0.635	0.098	-3.735	0	0.47	0.859
ATP8B2	0.423	0.153	2.759	0.006	1.526	0.234	2.25	0.024	1.13	2.061
UBE2Q1-AS1	-0.612	0.154	-3.974	0	0.542	0.083	-5.48	0	0.401	0.733
GBAP1	-0.401	0.152	-2.636	0.008	0.67	0.102	-3.242	0.001	0.497	0.902
AL353807.4	-0.451	0.152	-2.964	0.003	0.637	0.097	-3.745	0	0.473	0.858
KHDC4	-0.532	0.154	-3.463	0.001	0.587	0.09	-4.572	0	0.435	0.794
ARHGEF2-AS1	-0.405	0.153	-2.651	0.008	0.667	0.102	-3.269	0.001	0.494	0.9
RHBG	-0.466	0.154	-3.028	0.002	0.627	0.097	-3.857	0	0.464	0.848
AL139130.1	-0.501	0.153	-3.272	0.001	0.606	0.093	-4.247	0	0.449	0.818
TTC24	-0.451	0.152	-2.965	0.003	0.637	0.097	-3.747	0	0.473	0.858
SH2D2A	-0.455	0.153	-2.968	0.003	0.634	0.097	-3.76	0	0.469	0.857
SPTA1	0.441	0.153	2.884	0.004	1.555	0.238	2.331	0.02	1.152	2.099
CASQ1	-0.497	0.154	-3.227	0.001	0.608	0.094	-4.18	0	0.45	0.823
USF1	-0.575	0.154	-3.73	0	0.563	0.087	-5.042	0	0.416	0.761
AL592295.1	-0.403	0.153	-2.626	0.009	0.668	0.103	-3.234	0.001	0.495	0.903
RPL31P11	-0.432	0.154	-2.811	0.005	0.649	0.1	-3.516	0	0.481	0.877
C1orf226	-0.424	0.153	-2.776	0.005	0.654	0.1	-3.458	0.001	0.485	0.883
METTL11B	0.439	0.154	2.856	0.004	1.552	0.239	2.311	0.021	1.148	2.098
DARS2	0.4	0.152	2.626	0.009	1.492	0.227	2.164	0.03	1.107	2.012
AL591043.2	-0.41	0.154	-2.666	0.008	0.664	0.102	-3.296	0.001	0.491	0.897
RASAL2	0.544	0.154	3.541	0	1.724	0.265	2.73	0.006	1.275	2.33
ANGPTL1	0.438	0.153	2.853	0.004	1.549	0.237	2.311	0.021	1.147	2.092
ABL2	0.486	0.153	3.171	0.002	1.626	0.249	2.511	0.012	1.204	2.195
LAMC1	0.533	0.155	3.452	0.001	1.705	0.263	2.676	0.007	1.259	2.308
NIBAN1	0.403	0.153	2.634	0.008	1.496	0.229	2.168	0.03	1.109	2.019
AL096803.3	-0.402	0.152	-2.643	0.008	0.669	0.102	-3.253	0.001	0.497	0.901
GPR25	-0.689	0.154	-4.482	0	0.502	0.077	-6.451	0	0.372	0.679
KIF21B	-0.397	0.153	-2.597	0.009	0.672	0.103	-3.188	0.001	0.498	0.907
CSRP1	0.438	0.154	2.84	0.005	1.549	0.239	2.3	0.021	1.145	2.095
IPO9-AS1	-0.423	0.152	-2.777	0.005	0.655	0.1	-3.457	0.001	0.486	0.883
MIR6739	-0.399	0.152	-2.62	0.009	0.671	0.102	-3.219	0.001	0.498	0.904
MGAT4EP	-0.404	0.152	-2.649	0.008	0.668	0.102	-3.264	0.001	0.495	0.9
FMOD	0.44	0.154	2.856	0.004	1.553	0.24	2.31	0.021	1.148	2.101
PRELP	0.505	0.155	3.26	0.001	1.656	0.256	2.56	0.01	1.223	2.243
ATP2B4	0.499	0.153	3.256	0.001	1.647	0.252	2.563	0.01	1.22	2.224
PLEKHA6	-0.414	0.153	-2.707	0.007	0.661	0.101	-3.354	0.001	0.489	0.892
PIK3C2B	-0.426	0.153	-2.792	0.005	0.653	0.1	-3.481	0	0.484	0.881
MDM4	-0.394	0.152	-2.595	0.009	0.674	0.102	-3.181	0.001	0.501	0.908
CTSE	-0.451	0.154	-2.926	0.003	0.637	0.098	-3.698	0	0.471	0.862
MIR29B2CHG	-0.439	0.154	-2.846	0.004	0.645	0.099	-3.573	0	0.476	0.872
TRAF5	-0.424	0.153	-2.779	0.005	0.654	0.1	-3.461	0.001	0.485	0.883
TATDN3	-0.45	0.154	-2.92	0.004	0.638	0.098	-3.687	0	0.472	0.863
PTPN14	0.431	0.153	2.809	0.005	1.539	0.236	2.282	0.023	1.139	2.079
KCTD3	0.407	0.153	2.669	0.008	1.503	0.229	2.193	0.028	1.114	2.026
DEGS1	0.563	0.155	3.625	0	1.757	0.273	2.771	0.006	1.295	2.382
AC092809.5	-0.503	0.153	-3.281	0.001	0.605	0.093	-4.263	0	0.448	0.817
LEFTY2	0.467	0.155	3.016	0.003	1.594	0.247	2.41	0.016	1.177	2.159
AL118511.1	-0.429	0.153	-2.807	0.005	0.651	0.1	-3.506	0	0.483	0.879
BECN2	-0.481	0.152	-3.154	0.002	0.618	0.094	-4.049	0	0.459	0.834
LINC01341	-0.461	0.154	-2.987	0.003	0.63	0.097	-3.795	0	0.466	0.853
ZNF124	-0.42	0.152	-2.762	0.006	0.657	0.1	-3.433	0.001	0.487	0.885
AL390728.6	-0.696	0.155	-4.48	0	0.499	0.077	-6.473	0	0.368	0.676
AL390728.4	-0.563	0.154	-3.664	0	0.57	0.087	-4.919	0	0.422	0.77
PGBD2	-0.448	0.152	-2.941	0.003	0.639	0.097	-3.711	0	0.474	0.861
RNASEH1	0.397	0.153	2.605	0.009	1.488	0.227	2.15	0.032	1.103	2.006
ID2-AS1	-0.466	0.153	-3.043	0.002	0.628	0.096	-3.876	0	0.465	0.847
AC007240.1	-0.434	0.153	-2.844	0.004	0.648	0.099	-3.562	0	0.48	0.874
PDIA6	0.449	0.153	2.935	0.003	1.567	0.24	2.365	0.018	1.161	2.115
NBAS	0.509	0.154	3.301	0.001	1.664	0.257	2.587	0.01	1.23	2.251
AC079148.1	-0.621	0.154	-4.021	0	0.537	0.083	-5.574	0	0.397	0.727
PTGES3P2	-0.449	0.152	-2.943	0.003	0.638	0.097	-3.715	0	0.473	0.861
ADGRF3	-0.522	0.154	-3.392	0.001	0.594	0.091	-4.453	0	0.439	0.802
OTOF	-0.402	0.153	-2.622	0.009	0.669	0.103	-3.228	0.001	0.495	0.903
SLC4A1AP	0.419	0.154	2.725	0.006	1.521	0.234	2.226	0.026	1.125	2.056
AC104695.3	-0.521	0.153	-3.401	0.001	0.594	0.091	-4.462	0	0.44	0.802
SPDYA	-0.43	0.152	-2.832	0.005	0.65	0.099	-3.539	0	0.483	0.876
PCARE	0.535	0.154	3.479	0.001	1.708	0.263	2.693	0.007	1.263	2.31
LINC01936	0.454	0.155	2.93	0.003	1.574	0.244	2.355	0.019	1.162	2.133
AC092569.1	-0.474	0.153	-3.087	0.002	0.623	0.096	-3.948	0	0.461	0.841
LTBP1	0.409	0.154	2.655	0.008	1.505	0.232	2.179	0.029	1.113	2.036
AC007390.1	-0.554	0.153	-3.615	0	0.575	0.088	-4.829	0	0.426	0.776
AC011247.1	-0.401	0.152	-2.633	0.008	0.67	0.102	-3.239	0.001	0.497	0.903
LINC01126	-0.396	0.152	-2.604	0.009	0.673	0.102	-3.196	0.001	0.499	0.907
AC020604.1	-0.468	0.153	-3.062	0.002	0.626	0.096	-3.904	0	0.464	0.845
MCFD2	0.417	0.153	2.723	0.006	1.517	0.232	2.227	0.026	1.124	2.048
STON1	0.427	0.153	2.785	0.005	1.533	0.235	2.266	0.023	1.135	2.071
NRXN1	0.435	0.153	2.851	0.004	1.546	0.236	2.311	0.021	1.146	2.085
CLHC1	-0.526	0.154	-3.426	0.001	0.591	0.091	-4.51	0	0.437	0.798
EFEMP1	0.561	0.155	3.612	0	1.753	0.272	2.764	0.006	1.293	2.377
AHSA2P	-0.484	0.153	-3.162	0.002	0.616	0.094	-4.067	0	0.456	0.832
TMEM17	0.398	0.153	2.596	0.009	1.488	0.228	2.142	0.032	1.102	2.009
EHBP1	0.516	0.154	3.36	0.001	1.675	0.257	2.625	0.009	1.24	2.263
AC008074.2	-0.404	0.152	-2.652	0.008	0.668	0.102	-3.268	0.001	0.495	0.9
LINC01873	-0.416	0.153	-2.723	0.006	0.66	0.101	-3.377	0.001	0.489	0.89
GKN1	-0.43	0.153	-2.799	0.005	0.651	0.1	-3.496	0	0.482	0.879
AC092431.1	0.415	0.154	2.693	0.007	1.515	0.234	2.204	0.028	1.12	2.049
PCBP1-AS1	-0.606	0.154	-3.943	0	0.545	0.084	-5.421	0	0.404	0.737
TIA1	-0.483	0.153	-3.167	0.002	0.617	0.094	-4.071	0	0.457	0.832
MTHFD2	0.441	0.153	2.875	0.004	1.554	0.239	2.324	0.02	1.151	2.1
SLC4A5	-0.444	0.152	-2.918	0.004	0.642	0.098	-3.672	0	0.476	0.864
WBP1	-0.396	0.152	-2.601	0.009	0.673	0.103	-3.191	0.001	0.499	0.907
ELMOD3	-0.516	0.154	-3.358	0.001	0.597	0.092	-4.395	0	0.442	0.807
AC062037.1	-0.432	0.152	-2.836	0.005	0.649	0.099	-3.546	0	0.482	0.875
ST3GAL5	-0.458	0.154	-2.97	0.003	0.633	0.098	-3.768	0	0.468	0.856
ST3GAL5-AS1	-0.468	0.153	-3.047	0.002	0.627	0.096	-3.885	0	0.464	0.846
PTCD3	-0.481	0.153	-3.141	0.002	0.618	0.095	-4.033	0	0.458	0.835
REEP1	0.507	0.155	3.279	0.001	1.66	0.257	2.573	0.01	1.226	2.248
RNF103	-0.421	0.153	-2.762	0.006	0.656	0.1	-3.434	0.001	0.487	0.885
PLGLB1	-0.511	0.153	-3.334	0.001	0.6	0.092	-4.35	0	0.445	0.81
WBP1P2	-0.432	0.153	-2.821	0.005	0.649	0.099	-3.529	0	0.481	0.876
DUSP2	-0.404	0.153	-2.638	0.008	0.667	0.102	-3.252	0.001	0.494	0.901
AC012307.1	-0.446	0.153	-2.905	0.004	0.64	0.098	-3.66	0	0.474	0.865
NEURL3	-0.465	0.153	-3.034	0.002	0.628	0.096	-3.863	0	0.465	0.848
ANKRD23	-0.414	0.152	-2.719	0.007	0.661	0.101	-3.368	0.001	0.491	0.891
ANKRD39	-0.44	0.153	-2.887	0.004	0.644	0.098	-3.627	0	0.477	0.868
ACTR1B	-0.42	0.153	-2.746	0.006	0.657	0.1	-3.412	0.001	0.487	0.887
C2orf92	-0.524	0.153	-3.424	0.001	0.592	0.091	-4.499	0	0.439	0.799
COA5	-0.501	0.153	-3.287	0.001	0.606	0.092	-4.267	0	0.449	0.817
AC079447.1	-0.493	0.153	-3.227	0.001	0.611	0.093	-4.171	0	0.453	0.824
LIPT1	-0.562	0.153	-3.663	0	0.57	0.087	-4.915	0	0.422	0.77
MITD1	-0.672	0.155	-4.337	0	0.511	0.079	-6.183	0	0.377	0.692
LYG1	-0.418	0.152	-2.749	0.006	0.658	0.1	-3.413	0.001	0.488	0.887
PDCL3	-0.484	0.153	-3.154	0.002	0.616	0.095	-4.057	0	0.456	0.833
NPAS2	-0.437	0.153	-2.851	0.004	0.646	0.099	-3.575	0	0.479	0.872
AC016738.1	-0.509	0.153	-3.329	0.001	0.601	0.092	-4.341	0	0.445	0.811
SNORD89	-0.441	0.153	-2.88	0.004	0.643	0.099	-3.62	0	0.477	0.869
IL1RL1	0.411	0.152	2.706	0.007	1.508	0.229	2.219	0.026	1.12	2.031
ECRG4	0.568	0.155	3.673	0	1.764	0.273	2.803	0.005	1.303	2.389
SULT1C2	-0.492	0.155	-3.186	0.001	0.611	0.094	-4.116	0	0.452	0.827
LINC01106	-0.405	0.152	-2.665	0.008	0.667	0.101	-3.285	0.001	0.495	0.898
ACOXL	-0.421	0.153	-2.75	0.006	0.656	0.1	-3.42	0.001	0.486	0.886
ZC3H8	-0.394	0.152	-2.594	0.009	0.674	0.102	-3.18	0.001	0.5	0.908
NT5DC4	-0.495	0.154	-3.224	0.001	0.609	0.094	-4.173	0	0.451	0.823
AC016683.1	-0.446	0.154	-2.898	0.004	0.64	0.099	-3.652	0	0.473	0.866
FOXD4L1	-0.445	0.152	-2.918	0.004	0.641	0.098	-3.675	0	0.475	0.864
WASH2P	-0.454	0.153	-2.972	0.003	0.635	0.097	-3.76	0	0.471	0.857
RABL2A	-0.474	0.153	-3.099	0.002	0.623	0.095	-3.965	0	0.461	0.84
AC110769.2	-0.4	0.152	-2.635	0.008	0.67	0.102	-3.24	0.001	0.498	0.903
MTND4P26	-0.397	0.152	-2.617	0.009	0.672	0.102	-3.213	0.001	0.499	0.905
GYPC	0.404	0.153	2.635	0.008	1.497	0.229	2.168	0.03	1.109	2.022
NOC2LP1	0.395	0.152	2.604	0.009	1.485	0.225	2.151	0.031	1.103	2
SMPD4BP	-0.418	0.152	-2.749	0.006	0.658	0.1	-3.413	0.001	0.488	0.887
ACMSD	-0.542	0.155	-3.509	0	0.581	0.09	-4.658	0	0.43	0.787
CCNT2	-0.437	0.153	-2.863	0.004	0.646	0.099	-3.59	0	0.479	0.871
ACVR1	0.403	0.153	2.626	0.009	1.496	0.229	2.162	0.031	1.108	2.02
DAPL1	0.396	0.152	2.596	0.009	1.485	0.226	2.144	0.032	1.102	2.002
SCN7A	0.565	0.155	3.653	0	1.759	0.272	2.791	0.005	1.299	2.381
GAD1	-0.445	0.153	-2.914	0.004	0.641	0.098	-3.672	0	0.475	0.864
CIR1	-0.436	0.153	-2.848	0.004	0.647	0.099	-3.569	0	0.479	0.873
OSBPL6	0.551	0.155	3.564	0	1.735	0.268	2.74	0.006	1.282	2.35
AC010680.4	-0.438	0.152	-2.872	0.004	0.646	0.098	-3.603	0	0.479	0.87
AC009962.1	0.415	0.152	2.728	0.006	1.515	0.231	2.232	0.026	1.124	2.041
ITPRID2	0.492	0.153	3.21	0.001	1.635	0.251	2.536	0.011	1.211	2.208
PDE1A	0.446	0.153	2.913	0.004	1.561	0.239	2.35	0.019	1.157	2.108
FSIP2	-0.428	0.153	-2.797	0.005	0.652	0.1	-3.491	0	0.483	0.88
FAM171B	0.475	0.154	3.084	0.002	1.608	0.248	2.455	0.014	1.189	2.175
GULP1	0.491	0.154	3.181	0.001	1.634	0.252	2.514	0.012	1.207	2.211
OSGEPL1	-0.403	0.152	-2.655	0.008	0.668	0.101	-3.27	0.001	0.496	0.9
AC013468.1	-0.465	0.154	-3.018	0.003	0.628	0.097	-3.842	0	0.464	0.85
ORMDL1	-0.515	0.153	-3.371	0.001	0.597	0.091	-4.411	0	0.443	0.806
PMS1	-0.481	0.153	-3.15	0.002	0.618	0.094	-4.044	0	0.459	0.834
MSTN	-0.409	0.153	-2.678	0.007	0.664	0.102	-3.309	0.001	0.492	0.896
SATB2-AS1	0.498	0.153	3.261	0.001	1.646	0.251	2.568	0.01	1.22	2.22
RNU6-762P	-0.445	0.152	-2.924	0.003	0.641	0.098	-3.683	0	0.475	0.863
NRP2	0.46	0.155	2.969	0.003	1.584	0.245	2.381	0.017	1.169	2.145
ADAM23	0.428	0.153	2.793	0.005	1.534	0.235	2.273	0.023	1.136	2.071
CCNYL1	0.429	0.154	2.788	0.005	1.535	0.236	2.267	0.023	1.136	2.075
MAP2	0.617	0.155	3.971	0	1.853	0.288	2.964	0.003	1.367	2.512
UNC80	0.42	0.153	2.755	0.006	1.522	0.232	2.25	0.024	1.129	2.053
AC007038.1	-0.509	0.153	-3.327	0.001	0.601	0.092	-4.338	0	0.445	0.811
FN1	0.473	0.154	3.068	0.002	1.605	0.248	2.444	0.015	1.186	2.172
TNS1	0.442	0.154	2.875	0.004	1.555	0.239	2.324	0.02	1.151	2.102
RUFY4	-0.586	0.154	-3.809	0	0.557	0.086	-5.179	0	0.412	0.752
DNPEP	-0.412	0.152	-2.703	0.007	0.663	0.101	-3.344	0.001	0.492	0.893
SERPINE2	0.482	0.153	3.143	0.002	1.62	0.248	2.494	0.013	1.199	2.187
AC073052.1	-0.617	0.155	-3.983	0	0.539	0.084	-5.509	0	0.398	0.731
PID1	0.618	0.155	3.99	0	1.856	0.288	2.975	0.003	1.37	2.515
RN7SL834P	-0.612	0.154	-3.987	0	0.542	0.083	-5.5	0	0.401	0.732
PDE6D	-0.452	0.153	-2.96	0.003	0.636	0.097	-3.742	0	0.472	0.858
COPS7B	-0.409	0.152	-2.693	0.007	0.664	0.101	-3.328	0.001	0.493	0.895
SAG	-0.498	0.153	-3.248	0.001	0.608	0.093	-4.21	0	0.45	0.821
ARL4C	0.429	0.153	2.798	0.005	1.536	0.236	2.275	0.023	1.137	2.075
LINC02610	-0.398	0.153	-2.601	0.009	0.672	0.103	-3.195	0.001	0.497	0.907
AC011298.1	-0.459	0.153	-2.998	0.003	0.632	0.097	-3.804	0	0.468	0.853
SNED1	0.406	0.153	2.65	0.008	1.501	0.23	2.178	0.029	1.112	2.027
CHL1	0.421	0.153	2.751	0.006	1.524	0.233	2.246	0.025	1.129	2.057
AC024060.2	-0.438	0.152	-2.876	0.004	0.645	0.098	-3.609	0	0.478	0.87
SETMAR	-0.411	0.152	-2.7	0.007	0.663	0.101	-3.339	0.001	0.492	0.893
THUMPD3-AS1	-0.471	0.153	-3.085	0.002	0.624	0.095	-3.941	0	0.463	0.842
ARPC4-TTLL3	-0.432	0.153	-2.826	0.005	0.649	0.099	-3.534	0	0.481	0.876
TTLL3	-0.549	0.154	-3.568	0	0.578	0.089	-4.753	0	0.427	0.781
AC022382.1	-0.404	0.153	-2.639	0.008	0.668	0.102	-3.251	0.001	0.495	0.901
LINC00852	-0.538	0.153	-3.515	0	0.584	0.089	-4.655	0	0.433	0.788
GHRLOS	-0.415	0.153	-2.704	0.007	0.661	0.101	-3.351	0.001	0.489	0.892
PPARG	-0.468	0.154	-3.046	0.002	0.626	0.096	-3.885	0	0.463	0.846
AC093495.1	-0.421	0.152	-2.764	0.006	0.656	0.1	-3.437	0.001	0.487	0.885
CCDC174	-0.395	0.152	-2.599	0.009	0.674	0.102	-3.187	0.001	0.5	0.907
SH3BP5-AS1	-0.67	0.155	-4.323	0	0.512	0.079	-6.159	0	0.377	0.693
EAF1-AS1	-0.463	0.154	-3.009	0.003	0.629	0.097	-3.827	0	0.466	0.851
AC090948.1	-0.417	0.152	-2.737	0.006	0.659	0.1	-3.396	0.001	0.489	0.888
AC090948.3	-0.406	0.152	-2.672	0.008	0.666	0.101	-3.296	0.001	0.494	0.897
ZNF385D	0.52	0.153	3.401	0.001	1.682	0.257	2.652	0.008	1.246	2.269
AZI2	0.412	0.153	2.704	0.007	1.51	0.23	2.216	0.027	1.12	2.037
RBMS3	0.475	0.153	3.104	0.002	1.608	0.246	2.471	0.013	1.191	2.17
RBMS3-AS3	0.492	0.153	3.22	0.001	1.635	0.25	2.544	0.011	1.212	2.206
AC105749.1	-0.466	0.152	-3.058	0.002	0.628	0.096	-3.895	0	0.466	0.846
AC011816.2	-0.498	0.154	-3.239	0.001	0.608	0.093	-4.197	0	0.45	0.822
DLEC1	-0.449	0.153	-2.926	0.003	0.638	0.098	-3.693	0	0.473	0.862
RNU5B-2P	-0.421	0.153	-2.747	0.006	0.656	0.101	-3.416	0.001	0.486	0.886
RNU4-78P	-0.452	0.153	-2.943	0.003	0.637	0.098	-3.72	0	0.471	0.86
SS18L2	-0.4	0.153	-2.616	0.009	0.671	0.102	-3.216	0.001	0.497	0.905
NKTR	-0.479	0.153	-3.123	0.002	0.62	0.095	-4.005	0	0.459	0.837
TCAIM	-0.463	0.153	-3.024	0.002	0.629	0.096	-3.845	0	0.466	0.85
CCRL2	-0.485	0.154	-3.149	0.002	0.616	0.095	-4.053	0	0.455	0.833
LRRC2-AS1	-0.405	0.153	-2.651	0.008	0.667	0.102	-3.268	0.001	0.494	0.9
IP6K2	-0.411	0.153	-2.686	0.007	0.663	0.101	-3.322	0.001	0.492	0.895
C3orf62	-0.401	0.153	-2.617	0.009	0.67	0.103	-3.219	0.001	0.496	0.904
UBA7	-0.426	0.153	-2.782	0.005	0.653	0.1	-3.468	0.001	0.484	0.882
RBM6	-0.404	0.153	-2.643	0.008	0.668	0.102	-3.256	0.001	0.495	0.901
SEMA3F-AS1	-0.47	0.153	-3.061	0.002	0.625	0.096	-3.907	0	0.463	0.845
HYAL3	0.628	0.154	4.078	0	1.874	0.289	3.028	0.002	1.386	2.534
ACY1	-0.468	0.155	-3.024	0.002	0.627	0.097	-3.855	0	0.463	0.848
DNAH1	-0.46	0.153	-3.013	0.003	0.631	0.096	-3.827	0	0.468	0.851
AC092045.1	-0.506	0.154	-3.292	0.001	0.603	0.093	-4.285	0	0.446	0.815
SNORD19	-0.481	0.153	-3.137	0.002	0.618	0.095	-4.027	0	0.458	0.835
SNORD19C	-0.507	0.153	-3.311	0.001	0.602	0.092	-4.313	0	0.446	0.813
ITIH4	-0.592	0.155	-3.82	0	0.553	0.086	-5.212	0	0.408	0.749
AC006254.1	-0.651	0.155	-4.206	0	0.522	0.081	-5.928	0	0.385	0.706
AC012467.1	-0.501	0.154	-3.259	0.001	0.606	0.093	-4.231	0	0.448	0.819
SPATA12	-0.452	0.152	-2.97	0.003	0.637	0.097	-3.754	0	0.473	0.858
AC012557.2	-0.433	0.153	-2.836	0.005	0.649	0.099	-3.549	0	0.481	0.875
ADAMTS9	0.41	0.153	2.683	0.007	1.507	0.23	2.201	0.028	1.117	2.033
ADAMTS9-AS1	0.594	0.156	3.806	0	1.811	0.283	2.87	0.004	1.334	2.46
ADAMTS9-AS2	0.56	0.155	3.624	0	1.751	0.27	2.775	0.006	1.293	2.37
LRIG1	0.4	0.153	2.605	0.009	1.491	0.229	2.147	0.032	1.104	2.015
AC097634.1	-0.408	0.152	-2.683	0.007	0.665	0.101	-3.313	0.001	0.493	0.896
GXYLT2	0.544	0.157	3.472	0.001	1.723	0.27	2.678	0.007	1.267	2.343
AC117489.1	0.45	0.153	2.944	0.003	1.568	0.24	2.37	0.018	1.162	2.116
LINC02018	-0.399	0.153	-2.613	0.009	0.671	0.103	-3.211	0.001	0.497	0.905
PROS1	0.555	0.153	3.618	0	1.742	0.267	2.777	0.005	1.29	2.353
ST3GAL6-AS1	0.507	0.154	3.295	0.001	1.66	0.255	2.585	0.01	1.228	2.244
DCBLD2	0.408	0.154	2.656	0.008	1.504	0.231	2.181	0.029	1.113	2.033
AC069222.1	-0.451	0.152	-2.962	0.003	0.637	0.097	-3.744	0	0.472	0.858
ABI3BP	0.401	0.153	2.618	0.009	1.493	0.228	2.157	0.031	1.106	2.015
CD96	-0.561	0.154	-3.639	0	0.571	0.088	-4.881	0	0.422	0.772
CCDC80	0.428	0.155	2.764	0.006	1.534	0.237	2.249	0.025	1.133	2.078
BOC	0.649	0.156	4.151	0	1.914	0.3	3.053	0.002	1.409	2.601
CFAP44	-0.581	0.154	-3.769	0	0.559	0.086	-5.11	0	0.413	0.757
SIDT1	-0.491	0.154	-3.192	0.001	0.612	0.094	-4.122	0	0.453	0.827
MYLK	0.477	0.155	3.081	0.002	1.611	0.249	2.451	0.014	1.189	2.181
CCDC14	-0.506	0.153	-3.305	0.001	0.603	0.092	-4.303	0	0.446	0.814
GATA2	-0.544	0.153	-3.551	0	0.58	0.089	-4.719	0	0.43	0.784
AC108673.3	-0.409	0.153	-2.684	0.007	0.664	0.101	-3.316	0.001	0.493	0.896
AC010210.1	-0.41	0.153	-2.686	0.007	0.664	0.101	-3.32	0.001	0.492	0.895
NUDT16P1	-0.411	0.152	-2.699	0.007	0.663	0.101	-3.338	0.001	0.492	0.894
EPHB1	0.458	0.154	2.982	0.003	1.581	0.243	2.393	0.017	1.17	2.136
PPP2R3A	0.44	0.154	2.856	0.004	1.552	0.239	2.311	0.021	1.148	2.099
CLSTN2	0.524	0.156	3.37	0.001	1.69	0.263	2.622	0.009	1.245	2.292
RASA2	-0.447	0.152	-2.937	0.003	0.639	0.097	-3.704	0	0.474	0.862
PLSCR4	0.406	0.154	2.641	0.008	1.5	0.23	2.171	0.03	1.11	2.027
AGTR1	0.439	0.154	2.85	0.004	1.551	0.239	2.307	0.021	1.147	2.097
TM4SF1	0.428	0.153	2.803	0.005	1.534	0.234	2.281	0.023	1.137	2.068
TM4SF1-AS1	0.547	0.154	3.548	0	1.729	0.267	2.732	0.006	1.278	2.339
IGSF10	0.509	0.155	3.289	0.001	1.663	0.257	2.578	0.01	1.228	2.252
LINC02067	-0.544	0.155	-3.516	0	0.581	0.09	-4.67	0	0.429	0.786
BCHE	0.466	0.153	3.045	0.002	1.594	0.244	2.434	0.015	1.181	2.152
TERC	-0.401	0.153	-2.628	0.009	0.669	0.102	-3.233	0.001	0.496	0.903
GPR160	-0.439	0.153	-2.874	0.004	0.645	0.099	-3.608	0	0.478	0.87
LINC00501	-0.407	0.153	-2.669	0.008	0.666	0.102	-3.294	0.001	0.493	0.897
TTC14	-0.415	0.152	-2.727	0.006	0.66	0.1	-3.38	0.001	0.49	0.89
CRYGS	-0.423	0.153	-2.773	0.006	0.655	0.1	-3.452	0.001	0.486	0.883
AC068631.1	-0.553	0.154	-3.581	0	0.575	0.089	-4.782	0	0.425	0.779
RTP4	-0.519	0.153	-3.39	0.001	0.595	0.091	-4.444	0	0.441	0.803
AC080129.2	-0.504	0.154	-3.275	0.001	0.604	0.093	-4.257	0	0.447	0.817
LINC00884	-0.526	0.154	-3.428	0.001	0.591	0.091	-4.512	0	0.437	0.798
AC046143.2	-0.415	0.153	-2.71	0.007	0.66	0.101	-3.359	0.001	0.489	0.892
AC233280.1	-0.436	0.153	-2.845	0.004	0.647	0.099	-3.566	0	0.479	0.873
AC124944.2	-0.432	0.152	-2.836	0.005	0.649	0.099	-3.547	0	0.482	0.875
TM4SF19	0.455	0.153	2.971	0.003	1.576	0.241	2.387	0.017	1.167	2.127
AC132008.2	-0.482	0.154	-3.141	0.002	0.617	0.095	-4.036	0	0.457	0.834
AC253576.2	-0.499	0.153	-3.258	0.001	0.607	0.093	-4.225	0	0.45	0.82
PCGF3	-0.459	0.153	-3.008	0.003	0.632	0.096	-3.817	0	0.469	0.852
SLC26A1	-0.422	0.153	-2.752	0.006	0.656	0.101	-3.423	0.001	0.486	0.886
IDUA	-0.461	0.154	-2.999	0.003	0.63	0.097	-3.81	0	0.466	0.852
HAUS3	-0.413	0.153	-2.706	0.007	0.662	0.101	-3.35	0.001	0.491	0.892
AL645924.2	-0.431	0.152	-2.831	0.005	0.65	0.099	-3.539	0	0.482	0.876
HGFAC	-0.493	0.153	-3.21	0.001	0.611	0.094	-4.149	0	0.452	0.825
DOK7	-0.53	0.154	-3.444	0.001	0.589	0.091	-4.541	0	0.435	0.796
UNC93B4	-0.398	0.153	-2.602	0.009	0.672	0.103	-3.195	0.001	0.498	0.907
ZBTB49	-0.499	0.154	-3.243	0.001	0.607	0.093	-4.205	0	0.449	0.821
STX18	-0.4	0.153	-2.62	0.009	0.67	0.102	-3.222	0.001	0.497	0.904
CRMP1	0.409	0.153	2.672	0.008	1.506	0.231	2.193	0.028	1.115	2.033
LINC02481	-0.441	0.154	-2.872	0.004	0.643	0.099	-3.61	0	0.476	0.869
MRFAP1L1	-0.461	0.153	-3.024	0.002	0.63	0.096	-3.842	0	0.467	0.85
AC104825.1	-0.443	0.152	-2.904	0.004	0.642	0.098	-3.653	0	0.476	0.866
AC005674.2	-0.433	0.153	-2.837	0.005	0.649	0.099	-3.55	0	0.481	0.875
MIR3138	-0.443	0.153	-2.902	0.004	0.642	0.098	-3.65	0	0.476	0.866
AC005699.1	-0.404	0.153	-2.639	0.008	0.667	0.102	-3.252	0.001	0.494	0.901
FAM200B	-0.428	0.153	-2.803	0.005	0.652	0.099	-3.498	0	0.484	0.879
TAPT1	-0.414	0.152	-2.719	0.007	0.661	0.101	-3.367	0.001	0.491	0.891
AC006160.1	-0.584	0.154	-3.802	0	0.557	0.086	-5.165	0	0.413	0.753
FAM184B	-0.496	0.154	-3.225	0.001	0.609	0.094	-4.175	0	0.451	0.823
ANAPC4	-0.53	0.154	-3.448	0.001	0.588	0.091	-4.547	0	0.435	0.795
SEL1L3	-0.407	0.152	-2.676	0.007	0.666	0.101	-3.301	0.001	0.494	0.897
PTTG2	-0.451	0.154	-2.931	0.003	0.637	0.098	-3.703	0	0.471	0.861
FAM114A1	0.399	0.153	2.611	0.009	1.49	0.228	2.153	0.031	1.105	2.011
UCHL1	0.457	0.154	2.971	0.003	1.579	0.243	2.385	0.017	1.168	2.135
DCAF4L1	-0.534	0.154	-3.477	0.001	0.586	0.09	-4.596	0	0.434	0.792
AC106052.1	-0.487	0.153	-3.189	0.001	0.614	0.094	-4.108	0	0.456	0.829
OCIAD1-AS1	-0.462	0.152	-3.037	0.002	0.63	0.096	-3.86	0	0.468	0.849
SNORA26	-0.489	0.153	-3.197	0.001	0.614	0.094	-4.123	0	0.455	0.828
PDGFRA	0.416	0.153	2.719	0.007	1.517	0.232	2.224	0.026	1.123	2.047
UGT2B15	-0.483	0.154	-3.141	0.002	0.617	0.095	-4.039	0	0.456	0.834
AC124016.2	-0.52	0.154	-3.383	0.001	0.595	0.091	-4.436	0	0.44	0.804
SEC31A	0.418	0.153	2.733	0.006	1.519	0.232	2.234	0.025	1.126	2.05
AC114781.2	-0.437	0.153	-2.86	0.004	0.646	0.099	-3.587	0	0.479	0.872
GPAT3	0.436	0.153	2.848	0.004	1.546	0.237	2.308	0.021	1.146	2.088
ARHGAP24	0.413	0.153	2.693	0.007	1.512	0.232	2.206	0.027	1.119	2.042
SPARCL1	0.524	0.154	3.393	0.001	1.688	0.261	2.641	0.008	1.248	2.285
MEPE	-0.452	0.153	-2.958	0.003	0.636	0.097	-3.74	0	0.472	0.859
AC104785.1	-0.619	0.155	-3.981	0	0.539	0.084	-5.512	0	0.397	0.73
UNC5C	0.425	0.153	2.778	0.005	1.529	0.234	2.264	0.024	1.133	2.063
AP002026.1	-0.396	0.152	-2.6	0.009	0.673	0.103	-3.191	0.001	0.499	0.907
SLC9B2	0.427	0.153	2.788	0.005	1.533	0.235	2.269	0.023	1.135	2.069
AP1AR	-0.413	0.152	-2.714	0.007	0.661	0.101	-3.361	0.001	0.491	0.891
ALPK1	-0.45	0.153	-2.942	0.003	0.638	0.097	-3.714	0	0.473	0.861
MIR302CHG	-0.398	0.153	-2.606	0.009	0.672	0.103	-3.202	0.001	0.498	0.906
SYNPO2	0.518	0.155	3.345	0.001	1.679	0.26	2.611	0.009	1.239	2.275
AC093752.1	-0.4	0.152	-2.64	0.008	0.67	0.102	-3.247	0.001	0.498	0.902
ANXA5	0.417	0.153	2.723	0.006	1.517	0.232	2.227	0.026	1.124	2.048
IL21-AS1	-0.42	0.153	-2.738	0.006	0.657	0.101	-3.402	0.001	0.487	0.888
FAT4	0.473	0.155	3.048	0.002	1.604	0.249	2.429	0.015	1.184	2.175
C4orf33	-0.437	0.153	-2.85	0.004	0.646	0.099	-3.575	0	0.478	0.872
PCDH10	0.443	0.154	2.871	0.004	1.557	0.24	2.319	0.02	1.151	2.106
PCDH18	0.408	0.153	2.664	0.008	1.503	0.23	2.188	0.029	1.114	2.029
FAM192BP	-0.406	0.153	-2.647	0.008	0.666	0.102	-3.265	0.001	0.493	0.9
DCHS2	0.405	0.154	2.632	0.008	1.499	0.231	2.164	0.03	1.109	2.027
AC093788.1	-0.558	0.154	-3.625	0	0.572	0.088	-4.855	0	0.423	0.774
CPE	0.41	0.153	2.683	0.007	1.506	0.23	2.202	0.028	1.117	2.032
TLL1	0.606	0.154	3.928	0	1.834	0.283	2.945	0.003	1.355	2.482
PALLD	0.426	0.154	2.768	0.006	1.531	0.236	2.254	0.024	1.132	2.07
SCRG1	0.404	0.153	2.637	0.008	1.498	0.229	2.17	0.03	1.109	2.022
AC099343.3	-0.601	0.154	-3.896	0	0.548	0.085	-5.341	0	0.405	0.742
PDLIM3	0.495	0.155	3.189	0.001	1.64	0.255	2.516	0.012	1.21	2.223
ADAMTS16	0.449	0.154	2.915	0.004	1.567	0.242	2.348	0.019	1.159	2.121
ADCY2	0.403	0.153	2.638	0.008	1.497	0.229	2.171	0.03	1.109	2.019
SNORD123	-0.487	0.153	-3.175	0.001	0.614	0.094	-4.091	0	0.455	0.83
AC034229.4	-0.581	0.154	-3.769	0	0.559	0.086	-5.111	0	0.413	0.757
FBXL7	0.4	0.153	2.613	0.009	1.492	0.228	2.154	0.031	1.105	2.013
ADAMTS12	0.519	0.156	3.326	0.001	1.68	0.262	2.595	0.009	1.238	2.282
AC026741.1	-0.442	0.153	-2.898	0.004	0.642	0.098	-3.646	0	0.476	0.867
OXCT1	0.415	0.153	2.717	0.007	1.515	0.231	2.224	0.026	1.123	2.043
GHR	0.551	0.154	3.586	0	1.736	0.267	2.756	0.006	1.284	2.346
AC008875.1	-0.405	0.153	-2.653	0.008	0.667	0.102	-3.271	0.001	0.495	0.9
FGF10	0.536	0.155	3.468	0.001	1.709	0.264	2.685	0.007	1.262	2.314
AC112187.3	-0.602	0.155	-3.874	0	0.548	0.085	-5.313	0	0.404	0.743
GPBP1	-0.498	0.153	-3.262	0.001	0.608	0.093	-4.228	0	0.451	0.82
SHLD3	-0.513	0.152	-3.365	0.001	0.599	0.091	-4.397	0	0.444	0.807
OCLNP1	-0.428	0.152	-2.82	0.005	0.652	0.099	-3.52	0	0.484	0.878
MAP1B	0.461	0.154	2.993	0.003	1.586	0.244	2.398	0.016	1.173	2.146
POC5	-0.537	0.153	-3.503	0	0.585	0.09	-4.637	0	0.433	0.789
ARSB	0.538	0.155	3.464	0.001	1.713	0.266	2.679	0.007	1.263	2.323
BHMT2	0.431	0.154	2.8	0.005	1.539	0.237	2.274	0.023	1.138	2.082
HOMER1	0.416	0.153	2.724	0.006	1.516	0.231	2.228	0.026	1.124	2.044
THBS4	0.457	0.155	2.958	0.003	1.58	0.244	2.374	0.018	1.167	2.139
AC020923.1	-0.433	0.153	-2.824	0.005	0.648	0.1	-3.534	0	0.48	0.876
TMEM161B-AS1	-0.466	0.154	-3.02	0.003	0.628	0.097	-3.846	0	0.464	0.849
POLR3G	0.473	0.153	3.081	0.002	1.604	0.246	2.455	0.014	1.188	2.167
AC008799.1	-0.405	0.153	-2.639	0.008	0.667	0.102	-3.253	0.001	0.494	0.901
NR2F1-AS1	0.423	0.154	2.751	0.006	1.527	0.235	2.243	0.025	1.129	2.064
AC034236.3	-0.491	0.154	-3.192	0.001	0.612	0.094	-4.123	0	0.452	0.827
AC034236.2	-0.511	0.153	-3.33	0.001	0.6	0.092	-4.345	0	0.444	0.811
AC010255.1	0.528	0.154	3.426	0.001	1.695	0.261	2.662	0.008	1.253	2.292
AC093535.1	-0.488	0.154	-3.177	0.001	0.614	0.094	-4.096	0	0.454	0.829
FBN2	0.431	0.153	2.815	0.005	1.538	0.235	2.287	0.022	1.14	2.076
CDC42SE2	-0.426	0.153	-2.792	0.005	0.653	0.1	-3.481	0	0.484	0.881
RAPGEF6	-0.453	0.153	-2.97	0.003	0.636	0.097	-3.758	0	0.471	0.857
P4HA2	0.423	0.153	2.757	0.006	1.527	0.234	2.248	0.025	1.13	2.062
IRF1-AS1	-0.447	0.152	-2.938	0.003	0.639	0.097	-3.706	0	0.474	0.862
AC116366.1	-0.53	0.153	-3.46	0.001	0.588	0.09	-4.564	0	0.436	0.795
AC113410.2	-0.507	0.153	-3.308	0.001	0.602	0.092	-4.308	0	0.446	0.813
AC010608.2	-0.412	0.154	-2.673	0.008	0.662	0.102	-3.308	0.001	0.49	0.896
AC008608.2	-0.404	0.153	-2.647	0.008	0.667	0.102	-3.262	0.001	0.495	0.9
AC006077.2	-0.453	0.153	-2.959	0.003	0.636	0.097	-3.744	0	0.471	0.858
MTND3P25	-0.482	0.155	-3.12	0.002	0.618	0.095	-4.009	0	0.456	0.836
PCDHB1	-0.452	0.153	-2.962	0.003	0.636	0.097	-3.746	0	0.472	0.858
PCDHGA1	0.445	0.153	2.913	0.004	1.561	0.239	2.35	0.019	1.157	2.107
PCDHGA3	0.508	0.154	3.308	0.001	1.662	0.255	2.593	0.01	1.23	2.246
PCDHGA4	0.436	0.153	2.848	0.004	1.546	0.237	2.309	0.021	1.146	2.087
PCDHGB2	0.505	0.153	3.301	0.001	1.657	0.254	2.592	0.01	1.228	2.237
PCDHGB3	0.443	0.153	2.898	0.004	1.557	0.238	2.341	0.019	1.154	2.102
PCDHGC3	0.417	0.153	2.736	0.006	1.518	0.232	2.237	0.025	1.126	2.047
FCHSD1	-0.461	0.153	-3.017	0.003	0.63	0.096	-3.833	0	0.467	0.851
AC137770.1	-0.675	0.157	-4.304	0	0.509	0.08	-6.147	0	0.374	0.692
AC011411.1	-0.438	0.153	-2.87	0.004	0.645	0.098	-3.602	0	0.478	0.87
AC011375.1	-0.397	0.153	-2.599	0.009	0.672	0.103	-3.19	0.001	0.498	0.907
PPP2R2B	-0.402	0.153	-2.629	0.009	0.669	0.102	-3.236	0.001	0.496	0.903
HTR4	-0.564	0.154	-3.667	0	0.569	0.088	-4.925	0	0.421	0.769
LINC01933	-0.424	0.153	-2.767	0.006	0.654	0.1	-3.446	0.001	0.484	0.884
SGCD	0.416	0.154	2.694	0.007	1.516	0.234	2.204	0.028	1.12	2.051
HAVCR1	-0.532	0.154	-3.451	0.001	0.587	0.091	-4.556	0	0.434	0.795
CCNJL	-0.398	0.153	-2.604	0.009	0.672	0.103	-3.198	0.001	0.498	0.906
AC112191.2	-0.546	0.155	-3.524	0	0.579	0.09	-4.688	0	0.427	0.785
MAT2B	-0.432	0.152	-2.834	0.005	0.649	0.099	-3.544	0	0.482	0.875
TENM2	0.504	0.153	3.286	0.001	1.655	0.254	2.582	0.01	1.226	2.235
SH3PXD2B	0.407	0.153	2.652	0.008	1.502	0.23	2.179	0.029	1.112	2.028
FAM193B	-0.507	0.155	-3.28	0.001	0.602	0.093	-4.27	0	0.445	0.816
AC136632.2	-0.398	0.153	-2.596	0.009	0.672	0.103	-3.187	0.001	0.498	0.907
MRNIP	-0.418	0.152	-2.747	0.006	0.659	0.1	-3.409	0.001	0.489	0.887
AC008610.1	-0.44	0.153	-2.881	0.004	0.644	0.098	-3.62	0	0.477	0.869
LINC01011	-0.416	0.153	-2.722	0.006	0.66	0.101	-3.376	0.001	0.489	0.89
AL138831.3	-0.464	0.153	-3.037	0.002	0.629	0.096	-3.864	0	0.466	0.848
PRPF4B	-0.559	0.154	-3.635	0	0.572	0.088	-4.87	0	0.423	0.773
AL359643.3	0.459	0.153	3.002	0.003	1.582	0.242	2.407	0.016	1.173	2.135
F13A1	0.461	0.153	3.004	0.003	1.585	0.243	2.407	0.016	1.174	2.141
BMP6	0.411	0.152	2.698	0.007	1.508	0.23	2.213	0.027	1.119	2.033
RPS4XP7	-0.469	0.153	-3.068	0.002	0.626	0.096	-3.915	0	0.464	0.844
AL021407.3	-0.477	0.153	-3.118	0.002	0.62	0.095	-3.996	0	0.459	0.838
AL021407.1	-0.512	0.153	-3.338	0.001	0.599	0.092	-4.359	0	0.444	0.809
RBM24	0.442	0.153	2.884	0.004	1.556	0.239	2.331	0.02	1.152	2.102
MRS2	-0.4	0.152	-2.627	0.009	0.67	0.102	-3.23	0.001	0.497	0.903
TDP2	-0.655	0.155	-4.218	0	0.519	0.081	-5.959	0	0.383	0.704
AL031775.1	-0.577	0.154	-3.744	0	0.561	0.087	-5.066	0	0.415	0.76
AL031775.2	-0.424	0.152	-2.783	0.005	0.654	0.1	-3.467	0.001	0.485	0.882
CMAHP	0.46	0.153	3.002	0.003	1.585	0.243	2.406	0.016	1.173	2.14
TRIM38	-0.661	0.156	-4.243	0	0.516	0.08	-6.014	0	0.38	0.701
U91328.3	-0.493	0.154	-3.196	0.001	0.611	0.094	-4.131	0	0.452	0.826
H4C3	-0.413	0.153	-2.706	0.007	0.662	0.101	-3.351	0.001	0.491	0.892
H3C7	-0.446	0.153	-2.919	0.004	0.64	0.098	-3.678	0	0.475	0.864
BTN2A1	-0.471	0.153	-3.074	0.002	0.625	0.096	-3.926	0	0.463	0.843
ABT1	-0.46	0.155	-2.97	0.003	0.631	0.098	-3.772	0	0.466	0.855
AL133255.1	-0.494	0.155	-3.187	0.001	0.61	0.095	-4.122	0	0.45	0.827
ZNF165	-0.49	0.153	-3.195	0.001	0.613	0.094	-4.123	0	0.453	0.827
ZSCAN16	-0.424	0.153	-2.778	0.005	0.654	0.1	-3.459	0.001	0.485	0.883
ZSCAN9	-0.503	0.154	-3.273	0.001	0.605	0.093	-4.253	0	0.448	0.817
ZSCAN26	-0.461	0.152	-3.024	0.002	0.631	0.096	-3.842	0	0.468	0.85
AL645939.2	-0.435	0.152	-2.86	0.004	0.648	0.098	-3.582	0	0.481	0.872
AL645929.1	-0.496	0.153	-3.24	0.001	0.609	0.093	-4.194	0	0.451	0.822
ETF1P1	-0.417	0.153	-2.73	0.006	0.659	0.101	-3.388	0.001	0.488	0.889
TRIM26	-0.521	0.154	-3.377	0.001	0.594	0.092	-4.431	0	0.439	0.804
PAIP1P1	-0.48	0.153	-3.132	0.002	0.619	0.095	-4.02	0	0.459	0.836
RPP21	-0.43	0.154	-2.785	0.005	0.651	0.1	-3.479	0.001	0.481	0.88
ATAT1	-0.531	0.153	-3.46	0.001	0.588	0.09	-4.566	0	0.435	0.794
AL662797.2	-0.455	0.152	-2.987	0.003	0.635	0.097	-3.783	0	0.471	0.855
MUC22	0.396	0.152	2.6	0.009	1.486	0.226	2.147	0.032	1.102	2.002
POU5F1	-0.505	0.154	-3.276	0.001	0.603	0.093	-4.262	0	0.446	0.816
PSORS1C3	-0.464	0.154	-3.018	0.003	0.629	0.097	-3.84	0	0.465	0.85
DDX39B	-0.452	0.153	-2.956	0.003	0.636	0.097	-3.737	0	0.471	0.859
AL662899.2	-0.704	0.157	-4.497	0	0.495	0.077	-6.527	0	0.364	0.672
EHMT2-AS1	-0.685	0.156	-4.392	0	0.504	0.079	-6.309	0	0.371	0.684
AGER	-0.596	0.154	-3.86	0	0.551	0.085	-5.278	0	0.407	0.746
AL645940.1	-0.517	0.154	-3.361	0.001	0.596	0.092	-4.401	0	0.441	0.806
MIR7111	-0.445	0.153	-2.915	0.004	0.641	0.098	-3.67	0	0.475	0.864
SLC26A8	-0.665	0.156	-4.253	0	0.514	0.08	-6.04	0	0.379	0.699
Z84485.1	-0.501	0.153	-3.271	0.001	0.606	0.093	-4.247	0	0.449	0.818
ETV7	-0.658	0.154	-4.259	0	0.518	0.08	-6.026	0	0.383	0.701
ETV7-AS1	-0.705	0.155	-4.539	0	0.494	0.077	-6.591	0	0.365	0.67
KCNK5	-0.42	0.153	-2.748	0.006	0.657	0.1	-3.415	0.001	0.487	0.887
LRFN2	-0.45	0.154	-2.926	0.003	0.638	0.098	-3.695	0	0.472	0.862
ADCY10P1	-0.455	0.153	-2.966	0.003	0.635	0.097	-3.756	0	0.47	0.857
RPL24P4	-0.45	0.154	-2.925	0.003	0.637	0.098	-3.694	0	0.471	0.862
TTBK1	-0.448	0.152	-2.941	0.003	0.639	0.097	-3.71	0	0.474	0.861
VEGFA	-0.557	0.154	-3.617	0	0.573	0.088	-4.84	0	0.424	0.775
PAQR8	-0.398	0.153	-2.602	0.009	0.671	0.103	-3.197	0.001	0.497	0.906
RAB23	0.438	0.155	2.83	0.005	1.55	0.24	2.291	0.022	1.144	2.1
AL021368.2	-0.465	0.153	-3.04	0.002	0.628	0.096	-3.87	0	0.465	0.848
SCAT8	0.417	0.152	2.741	0.006	1.518	0.231	2.241	0.025	1.126	2.046
AL583856.2	-0.429	0.153	-2.795	0.005	0.651	0.1	-3.49	0	0.482	0.88
AL590428.1	0.455	0.154	2.958	0.003	1.576	0.242	2.377	0.017	1.166	2.13
CD109	0.465	0.154	3.021	0.003	1.591	0.245	2.417	0.016	1.177	2.151
AL359715.2	-0.445	0.153	-2.9	0.004	0.641	0.098	-3.653	0	0.474	0.866
PKMP3	-0.416	0.152	-2.728	0.006	0.66	0.101	-3.382	0.001	0.49	0.89
FHL5	0.438	0.152	2.881	0.004	1.55	0.236	2.333	0.02	1.15	2.087
KLHL32	-0.46	0.153	-3.01	0.003	0.631	0.096	-3.821	0	0.468	0.852
PNISR	-0.435	0.152	-2.852	0.004	0.647	0.099	-3.573	0	0.48	0.873
MTRES1	-0.413	0.153	-2.696	0.007	0.662	0.101	-3.338	0.001	0.49	0.893
Z98200.2	-0.478	0.153	-3.133	0.002	0.62	0.095	-4.017	0	0.46	0.836
AL109947.1	-0.435	0.152	-2.863	0.004	0.647	0.098	-3.588	0	0.48	0.872
REV3L	0.429	0.153	2.799	0.005	1.535	0.235	2.276	0.023	1.137	2.073
TUBE1	-0.424	0.153	-2.773	0.006	0.655	0.1	-3.453	0.001	0.485	0.883
Z99289.1	0.573	0.156	3.673	0	1.773	0.276	2.797	0.005	1.306	2.406
LINC02880	-0.456	0.153	-2.983	0.003	0.634	0.097	-3.778	0	0.47	0.855
TRAPPC3L	0.425	0.153	2.772	0.006	1.53	0.235	2.258	0.024	1.133	2.067
PLN	0.401	0.155	2.595	0.009	1.493	0.231	2.138	0.033	1.103	2.021
AL512283.1	-0.467	0.154	-3.037	0.002	0.627	0.096	-3.872	0	0.463	0.847
RNF217-AS1	0.432	0.153	2.824	0.005	1.54	0.235	2.294	0.022	1.141	2.078
RNF217	0.524	0.153	3.417	0.001	1.689	0.259	2.659	0.008	1.25	2.281
LAMA2	0.523	0.155	3.368	0.001	1.687	0.262	2.623	0.009	1.244	2.286
AKAP7	-0.397	0.153	-2.602	0.009	0.672	0.103	-3.194	0.001	0.499	0.907
CCN2	0.414	0.154	2.699	0.007	1.514	0.232	2.21	0.027	1.12	2.045
SNORA33	-0.44	0.152	-2.883	0.004	0.644	0.098	-3.621	0	0.478	0.869
AL049552.1	-0.401	0.152	-2.638	0.008	0.669	0.102	-3.246	0.001	0.497	0.902
AL138828.1	-0.402	0.153	-2.624	0.009	0.669	0.102	-3.229	0.001	0.496	0.903
PBOV1	-0.494	0.153	-3.227	0.001	0.61	0.093	-4.174	0	0.452	0.824
CCDC28A-AS1	-0.406	0.153	-2.647	0.008	0.666	0.102	-3.266	0.001	0.493	0.9
ABRACL	-0.638	0.155	-4.114	0	0.529	0.082	-5.755	0	0.39	0.716
TXLNB	0.399	0.153	2.61	0.009	1.49	0.228	2.152	0.031	1.104	2.01
AL023581.2	-0.425	0.153	-2.784	0.005	0.654	0.1	-3.469	0.001	0.485	0.882
STXBP5-AS1	-0.413	0.154	-2.689	0.007	0.662	0.102	-3.329	0.001	0.489	0.894
AL138733.1	-0.466	0.153	-3.046	0.002	0.627	0.096	-3.881	0	0.465	0.847
IPCEF1	-0.438	0.152	-2.875	0.004	0.645	0.098	-3.608	0	0.479	0.87
AL022069.2	-0.449	0.153	-2.941	0.003	0.638	0.097	-3.712	0	0.474	0.861
KIF25	-0.412	0.152	-2.703	0.007	0.662	0.101	-3.344	0.001	0.491	0.893
SMOC2	0.407	0.154	2.649	0.008	1.503	0.231	2.176	0.03	1.112	2.031
THBS2	0.45	0.155	2.897	0.004	1.568	0.243	2.333	0.02	1.157	2.125
CYP2W1	0.445	0.154	2.899	0.004	1.56	0.24	2.34	0.019	1.155	2.108
GNA12	0.485	0.153	3.161	0.002	1.624	0.249	2.504	0.012	1.202	2.195
CARD11	-0.438	0.154	-2.848	0.004	0.645	0.099	-3.573	0	0.477	0.872
AC092171.4	-0.447	0.153	-2.926	0.003	0.64	0.098	-3.689	0	0.474	0.863
CYTH3	0.543	0.155	3.514	0	1.722	0.266	2.711	0.007	1.272	2.331
UNC93B2	-0.541	0.154	-3.506	0	0.582	0.09	-4.65	0	0.43	0.788
AC006042.1	-0.483	0.153	-3.15	0.002	0.617	0.095	-4.048	0	0.457	0.833
DGKB	0.435	0.153	2.839	0.005	1.546	0.237	2.302	0.021	1.144	2.087
MEOX2	0.46	0.154	2.988	0.003	1.583	0.244	2.395	0.017	1.171	2.14
AC005014.2	-0.6	0.155	-3.862	0	0.549	0.085	-5.292	0	0.405	0.744
FAM126A	0.418	0.153	2.742	0.006	1.519	0.232	2.241	0.025	1.127	2.049
AC010719.1	-0.422	0.152	-2.771	0.006	0.656	0.1	-3.448	0.001	0.486	0.884
SCRN1	0.457	0.153	2.982	0.003	1.58	0.242	2.393	0.017	1.17	2.134
FKBP14	0.411	0.153	2.678	0.007	1.508	0.231	2.196	0.028	1.117	2.038
LINC01176	-0.412	0.153	-2.694	0.007	0.662	0.101	-3.334	0.001	0.491	0.894
AC005154.5	-0.414	0.153	-2.711	0.007	0.661	0.101	-3.358	0.001	0.49	0.892
GARS1	0.477	0.153	3.106	0.002	1.611	0.247	2.471	0.013	1.192	2.175
PDE1C	0.395	0.152	2.594	0.009	1.484	0.226	2.143	0.032	1.101	1.999
DPY19L1P2	0.398	0.152	2.611	0.009	1.489	0.227	2.154	0.031	1.104	2.007
FKBP9	0.539	0.155	3.485	0	1.714	0.265	2.695	0.007	1.266	2.32
RNU6-388P	-0.412	0.153	-2.693	0.007	0.662	0.101	-3.333	0.001	0.491	0.894
S100A11P2	-0.465	0.155	-3.005	0.003	0.628	0.097	-3.826	0	0.463	0.851
NPM1P18	0.465	0.153	3.044	0.002	1.591	0.243	2.435	0.015	1.18	2.146
ELMO1	0.402	0.153	2.629	0.009	1.495	0.229	2.164	0.03	1.108	2.017
EPDR1	0.436	0.153	2.846	0.004	1.547	0.237	2.306	0.021	1.145	2.09
AMPH	0.476	0.154	3.083	0.002	1.609	0.248	2.453	0.014	1.189	2.178
AC011290.2	-0.429	0.152	-2.821	0.005	0.651	0.099	-3.522	0	0.484	0.877
AC010132.4	-0.454	0.153	-2.968	0.003	0.635	0.097	-3.755	0	0.471	0.857
AC004453.1	-0.414	0.154	-2.688	0.007	0.661	0.102	-3.331	0.001	0.489	0.894
EGFR	0.461	0.153	3.007	0.003	1.586	0.243	2.409	0.016	1.174	2.142
TRIM60P18	-0.49	0.152	-3.212	0.001	0.613	0.093	-4.145	0	0.454	0.826
GTF2IP14	-0.446	0.153	-2.919	0.004	0.64	0.098	-3.678	0	0.475	0.864
CCT6P1	-0.41	0.152	-2.688	0.007	0.664	0.101	-3.323	0.001	0.493	0.895
TPST1	0.541	0.154	3.51	0	1.718	0.265	2.711	0.007	1.27	2.324
LINC02604	-0.502	0.153	-3.272	0.001	0.605	0.093	-4.249	0	0.448	0.818
AC006480.3	-0.467	0.153	-3.053	0.002	0.627	0.096	-3.891	0	0.465	0.846
NSUN5P2	-0.413	0.153	-2.704	0.007	0.661	0.101	-3.348	0.001	0.49	0.893
GTF2IRD2	-0.469	0.153	-3.061	0.002	0.626	0.096	-3.905	0	0.463	0.845
NSUN5P1	-0.591	0.154	-3.841	0	0.554	0.085	-5.236	0	0.41	0.749
PMS2P3	-0.439	0.152	-2.882	0.004	0.645	0.098	-3.619	0	0.478	0.869
GSAP	-0.468	0.153	-3.054	0.002	0.626	0.096	-3.893	0	0.464	0.846
TMEM60	-0.417	0.152	-2.738	0.006	0.659	0.1	-3.398	0.001	0.489	0.888
CACNA2D1	0.485	0.154	3.143	0.002	1.624	0.25	2.491	0.013	1.2	2.197
PCLO	0.45	0.153	2.933	0.003	1.568	0.24	2.363	0.018	1.161	2.117
AC002456.1	0.4	0.153	2.619	0.009	1.492	0.228	2.158	0.031	1.106	2.013
AC000120.1	-0.482	0.152	-3.167	0.002	0.617	0.094	-4.069	0	0.458	0.832
CDK6-AS1	0.444	0.153	2.901	0.004	1.559	0.238	2.343	0.019	1.155	2.103
AC006378.1	-0.485	0.153	-3.17	0.002	0.616	0.094	-4.079	0	0.456	0.831
AC002540.1	-0.454	0.152	-2.983	0.003	0.635	0.097	-3.775	0	0.471	0.856
AC004967.1	-0.477	0.153	-3.113	0.002	0.621	0.095	-3.989	0	0.46	0.838
ZNF789	-0.416	0.152	-2.737	0.006	0.66	0.1	-3.395	0.001	0.49	0.889
ZNF3	-0.41	0.152	-2.692	0.007	0.663	0.101	-3.329	0.001	0.492	0.894
GPC2	-0.409	0.153	-2.673	0.008	0.664	0.102	-3.302	0.001	0.492	0.897
STAG3L5P	-0.612	0.154	-3.985	0	0.542	0.083	-5.497	0	0.401	0.733
STAG3L5P-PVRIG2P-PILRB	-0.641	0.154	-4.152	0	0.527	0.081	-5.818	0	0.389	0.713
ZCWPW1	-0.474	0.153	-3.098	0.002	0.622	0.095	-3.964	0	0.461	0.84
AC254629.1	-0.466	0.153	-3.039	0.002	0.628	0.096	-3.87	0	0.465	0.848
TRIM56	-0.435	0.152	-2.862	0.004	0.647	0.098	-3.585	0	0.481	0.872
LINC01004	-0.459	0.153	-3.003	0.003	0.632	0.097	-3.812	0	0.468	0.853
AC004112.1	-0.431	0.152	-2.831	0.005	0.65	0.099	-3.54	0	0.482	0.876
AC079741.1	-0.505	0.153	-3.299	0.001	0.603	0.092	-4.292	0	0.447	0.815
CPED1	0.477	0.154	3.107	0.002	1.612	0.248	2.47	0.013	1.193	2.178
LMOD2	-0.432	0.153	-2.829	0.005	0.649	0.099	-3.539	0	0.481	0.876
TMEM229A	0.404	0.154	2.626	0.009	1.498	0.231	2.16	0.031	1.108	2.026
GPR37	0.519	0.154	3.371	0.001	1.681	0.259	2.629	0.009	1.243	2.274
EEF1GP1	0.537	0.154	3.483	0	1.711	0.264	2.695	0.007	1.265	2.315
CALU	0.414	0.154	2.694	0.007	1.513	0.233	2.205	0.027	1.12	2.046
FLNC	0.565	0.156	3.629	0	1.76	0.274	2.772	0.006	1.297	2.388
CPA4	0.543	0.155	3.51	0	1.721	0.266	2.709	0.007	1.271	2.33
AC008264.2	-0.445	0.153	-2.905	0.004	0.641	0.098	-3.659	0	0.475	0.865
CALD1	0.508	0.155	3.284	0.001	1.662	0.257	2.575	0.01	1.227	2.251
AC083862.1	-0.44	0.152	-2.895	0.004	0.644	0.098	-3.636	0	0.478	0.868
FAM180A	0.475	0.155	3.07	0.002	1.608	0.249	2.443	0.015	1.187	2.178
DGKI	0.472	0.154	3.074	0.002	1.604	0.246	2.45	0.014	1.187	2.167
TRBC2	-0.407	0.152	-2.675	0.007	0.665	0.101	-3.303	0.001	0.494	0.897
EPHB6	-0.584	0.154	-3.787	0	0.557	0.086	-5.145	0	0.412	0.754
AC005229.4	0.518	0.153	3.377	0.001	1.679	0.258	2.635	0.008	1.243	2.268
AC073314.1	-0.397	0.152	-2.61	0.009	0.672	0.102	-3.204	0.001	0.499	0.906
ZNF767P	-0.428	0.152	-2.818	0.005	0.651	0.099	-3.518	0	0.484	0.878
ZBED6CL	-0.404	0.152	-2.662	0.008	0.668	0.101	-3.279	0.001	0.496	0.899
AC006017.1	-0.399	0.152	-2.626	0.009	0.671	0.102	-3.228	0.001	0.498	0.904
AC093726.2	-0.445	0.153	-2.916	0.004	0.641	0.098	-3.672	0	0.475	0.864
PAXIP1-AS1	-0.411	0.152	-2.706	0.007	0.663	0.101	-3.347	0.001	0.492	0.893
AC021218.1	-0.434	0.153	-2.826	0.005	0.648	0.099	-3.538	0	0.48	0.876
AC004908.3	-0.418	0.152	-2.746	0.006	0.659	0.1	-3.408	0.001	0.489	0.887
RPL10P19	-0.51	0.153	-3.332	0.001	0.601	0.092	-4.346	0	0.445	0.811
AF131215.5	-0.445	0.153	-2.904	0.004	0.641	0.098	-3.658	0	0.475	0.865
CTSB	0.482	0.153	3.154	0.002	1.619	0.247	2.503	0.012	1.2	2.183
FAM90A25P	-0.402	0.152	-2.635	0.008	0.669	0.102	-3.243	0.001	0.496	0.902
AC068587.2	-0.415	0.153	-2.715	0.007	0.66	0.101	-3.364	0.001	0.49	0.891
LPL	0.446	0.153	2.914	0.004	1.562	0.239	2.351	0.019	1.157	2.107
DPYSL2	0.446	0.155	2.876	0.004	1.561	0.242	2.32	0.02	1.152	2.116
AC026979.3	-0.472	0.153	-3.081	0.002	0.624	0.096	-3.936	0	0.462	0.842
PPP2CB	0.407	0.154	2.639	0.008	1.502	0.232	2.168	0.03	1.11	2.032
AC090739.1	-0.432	0.152	-2.838	0.005	0.649	0.099	-3.55	0	0.482	0.875
AC024451.2	-0.424	0.152	-2.783	0.005	0.655	0.1	-3.466	0.001	0.486	0.882
RPL29P19	0.4	0.154	2.602	0.009	1.491	0.229	2.145	0.032	1.104	2.015
LINC02599	0.417	0.153	2.721	0.007	1.518	0.233	2.225	0.026	1.124	2.05
SNTG1	-0.447	0.154	-2.901	0.004	0.639	0.099	-3.658	0	0.473	0.865
AC113139.1	-0.412	0.152	-2.705	0.007	0.662	0.101	-3.347	0.001	0.491	0.893
AC107952.2	-0.437	0.153	-2.854	0.004	0.646	0.099	-3.579	0	0.479	0.872
FAM110B	0.419	0.153	2.734	0.006	1.52	0.233	2.234	0.025	1.126	2.051
LINC00967	-0.415	0.153	-2.72	0.007	0.66	0.101	-3.372	0.001	0.489	0.89
AC021321.1	-0.556	0.154	-3.625	0	0.573	0.088	-4.85	0	0.424	0.774
ZFHX4-AS1	0.434	0.154	2.815	0.005	1.543	0.238	2.284	0.022	1.141	2.087
AC036214.3	-0.403	0.153	-2.637	0.008	0.668	0.102	-3.248	0.001	0.495	0.902
PMP2	0.413	0.153	2.707	0.007	1.512	0.231	2.218	0.027	1.121	2.039
SLC10A5	-0.513	0.154	-3.327	0.001	0.599	0.092	-4.347	0	0.442	0.81
CHMP4C	-0.474	0.153	-3.1	0.002	0.623	0.095	-3.965	0	0.462	0.84
AC132219.1	-0.402	0.152	-2.645	0.008	0.669	0.102	-3.255	0.001	0.497	0.901
E2F5	-0.476	0.153	-3.108	0.002	0.621	0.095	-3.98	0	0.46	0.839
AC103760.1	-0.487	0.154	-3.17	0.002	0.615	0.094	-4.083	0	0.455	0.831
LRRC69	-0.469	0.153	-3.067	0.002	0.626	0.096	-3.913	0	0.464	0.844
AC120053.1	-0.457	0.153	-2.99	0.003	0.633	0.097	-3.79	0	0.47	0.854
GEM	0.408	0.154	2.655	0.008	1.503	0.231	2.181	0.029	1.113	2.031
RAD54B	-0.479	0.153	-3.139	0.002	0.619	0.095	-4.027	0	0.459	0.835
AC023632.2	-0.442	0.153	-2.891	0.004	0.643	0.098	-3.635	0	0.477	0.867
AP003352.1	-0.465	0.153	-3.034	0.002	0.628	0.096	-3.863	0	0.465	0.848
ERICH5	-0.462	0.153	-3.026	0.002	0.63	0.096	-3.846	0	0.467	0.85
VPS13B-DT	-0.409	0.153	-2.682	0.007	0.664	0.101	-3.315	0.001	0.492	0.896
SPAG1	-0.407	0.153	-2.668	0.008	0.665	0.102	-3.293	0.001	0.493	0.898
RNF19A	-0.448	0.153	-2.935	0.003	0.639	0.097	-3.702	0	0.474	0.862
GAPDHP62	-0.42	0.153	-2.736	0.006	0.657	0.101	-3.399	0.001	0.487	0.888
AC027373.1	-0.503	0.154	-3.262	0.001	0.605	0.093	-4.239	0	0.447	0.818
SUMO2P19	-0.434	0.153	-2.843	0.004	0.648	0.099	-3.559	0	0.481	0.874
AP002852.1	0.463	0.154	3.008	0.003	1.59	0.245	2.407	0.016	1.175	2.15
AARD	0.402	0.154	2.61	0.009	1.494	0.23	2.15	0.032	1.105	2.02
RPS10P16	-0.513	0.155	-3.315	0.001	0.599	0.093	-4.332	0	0.442	0.811
COL14A1	0.441	0.154	2.857	0.004	1.555	0.24	2.31	0.021	1.149	2.105
AC018992.1	-0.437	0.153	-2.857	0.004	0.646	0.099	-3.583	0	0.479	0.872
FBXO32	0.409	0.153	2.673	0.008	1.505	0.23	2.194	0.028	1.115	2.031
RNF139-AS1	-0.56	0.153	-3.651	0	0.571	0.088	-4.894	0	0.423	0.771
AC090198.1	-0.468	0.153	-3.061	0.002	0.626	0.096	-3.903	0	0.464	0.845
MYC	0.445	0.153	2.908	0.004	1.561	0.239	2.347	0.019	1.156	2.107
ASAP1	0.492	0.154	3.205	0.001	1.636	0.251	2.531	0.011	1.211	2.211
PSCA	-0.442	0.154	-2.877	0.004	0.643	0.099	-3.619	0	0.475	0.868
WDR97	-0.409	0.153	-2.683	0.007	0.664	0.101	-3.315	0.001	0.492	0.896
AC084125.2	-0.545	0.154	-3.552	0	0.58	0.089	-4.724	0	0.429	0.783
ZNF252P-AS1	-0.526	0.153	-3.428	0.001	0.591	0.091	-4.51	0	0.438	0.798
AL928970.1	-0.414	0.153	-2.712	0.007	0.661	0.101	-3.359	0.001	0.49	0.892
DOCK8	-0.543	0.154	-3.535	0	0.581	0.089	-4.696	0	0.43	0.785
MTCO1P11	-0.484	0.156	-3.107	0.002	0.616	0.096	-3.996	0	0.454	0.836
AL135786.2	-0.59	0.154	-3.842	0	0.554	0.085	-5.235	0	0.41	0.749
AL162411.1	-0.403	0.152	-2.646	0.008	0.669	0.102	-3.258	0.001	0.496	0.901
RNF2P1	-0.438	0.152	-2.87	0.004	0.646	0.098	-3.601	0	0.479	0.87
PTPRD	0.467	0.154	3.029	0.002	1.596	0.246	2.42	0.016	1.179	2.159
AL159169.3	-0.415	0.153	-2.707	0.007	0.66	0.101	-3.355	0.001	0.489	0.892
AL159169.2	-0.63	0.154	-4.079	0	0.533	0.082	-5.682	0	0.394	0.721
ZDHHC21	-0.588	0.154	-3.817	0	0.555	0.086	-5.196	0	0.411	0.751
AL391834.2	-0.457	0.153	-2.977	0.003	0.633	0.097	-3.773	0	0.469	0.856
AL158206.1	-0.408	0.154	-2.652	0.008	0.665	0.102	-3.276	0.001	0.492	0.899
HACD4	0.46	0.154	2.998	0.003	1.585	0.243	2.403	0.016	1.173	2.141
AL353746.1	0.523	0.153	3.406	0.001	1.687	0.259	2.653	0.008	1.249	2.278
AL157884.3	-0.493	0.152	-3.233	0.001	0.611	0.093	-4.179	0	0.453	0.824
AL157884.2	-0.408	0.152	-2.69	0.007	0.665	0.101	-3.322	0.001	0.494	0.895
AQP7	-0.465	0.154	-3.012	0.003	0.628	0.097	-3.834	0	0.464	0.85
CYP4F26P	-0.483	0.154	-3.146	0.002	0.617	0.095	-4.045	0	0.457	0.833
UBE2R2-AS1	-0.416	0.152	-2.732	0.006	0.659	0.101	-3.388	0.001	0.489	0.889
RPP25L	-0.444	0.153	-2.897	0.004	0.642	0.098	-3.647	0	0.475	0.866
FAM166B	-0.559	0.153	-3.643	0	0.572	0.088	-4.882	0	0.423	0.772
GBA2	-0.395	0.152	-2.6	0.009	0.674	0.102	-3.189	0.001	0.5	0.907
AL133410.1	-0.626	0.154	-4.052	0	0.535	0.083	-5.632	0	0.395	0.724
CCIN	0.433	0.155	2.799	0.005	1.542	0.239	2.272	0.023	1.139	2.088
ANXA1	0.656	0.155	4.246	0	1.928	0.298	3.113	0.002	1.424	2.61
PCSK5	0.451	0.153	2.951	0.003	1.57	0.24	2.376	0.018	1.164	2.118
AL772337.3	-0.491	0.154	-3.18	0.001	0.612	0.095	-4.106	0	0.452	0.828
AL353572.1	-0.544	0.153	-3.557	0	0.581	0.089	-4.726	0	0.43	0.783
AL353150.1	-0.43	0.152	-2.821	0.005	0.651	0.099	-3.525	0	0.483	0.877
SEMA4D	-0.598	0.155	-3.865	0	0.55	0.085	-5.29	0	0.406	0.745
OGN	0.563	0.156	3.61	0	1.756	0.274	2.76	0.006	1.293	2.383
FBP2	-0.476	0.152	-3.128	0.002	0.621	0.095	-4.005	0	0.461	0.837
AL161729.3	-0.417	0.154	-2.714	0.007	0.659	0.101	-3.368	0.001	0.487	0.891
MT1P1	-0.508	0.154	-3.298	0.001	0.602	0.093	-4.296	0	0.445	0.814
CTSV	0.398	0.153	2.609	0.009	1.489	0.227	2.153	0.031	1.104	2.008
AL590705.3	-0.401	0.153	-2.615	0.009	0.67	0.103	-3.217	0.001	0.496	0.904
TMOD1	0.552	0.155	3.562	0	1.736	0.269	2.738	0.006	1.282	2.351
AL136084.3	0.462	0.153	3.026	0.002	1.587	0.242	2.423	0.015	1.177	2.141
MSANTD3-TMEFF1	0.411	0.153	2.695	0.007	1.509	0.23	2.209	0.027	1.119	2.035
SMC2-AS1	-0.506	0.153	-3.314	0.001	0.603	0.092	-4.314	0	0.447	0.813
FKTN	0.475	0.153	3.102	0.002	1.608	0.246	2.469	0.014	1.191	2.171
AL138756.1	-0.415	0.153	-2.706	0.007	0.66	0.101	-3.354	0.001	0.489	0.892
AL359073.1	-0.399	0.153	-2.604	0.009	0.671	0.103	-3.2	0.001	0.497	0.906
AKNA	-0.415	0.152	-2.731	0.006	0.66	0.1	-3.386	0.001	0.49	0.889
TEX53	-0.408	0.153	-2.673	0.008	0.665	0.102	-3.301	0.001	0.493	0.897
GSN	0.513	0.153	3.354	0.001	1.67	0.255	2.624	0.009	1.238	2.253
GARNL3	-0.434	0.153	-2.835	0.005	0.648	0.099	-3.55	0	0.48	0.875
AL445222.2	-0.566	0.155	-3.643	0	0.568	0.088	-4.899	0	0.419	0.77
AL162586.1	-0.557	0.153	-3.627	0	0.573	0.088	-4.853	0	0.424	0.774
SLC25A25-AS1	-0.586	0.155	-3.779	0	0.557	0.086	-5.138	0	0.411	0.754
CERCAM	0.608	0.155	3.916	0	1.836	0.285	2.935	0.003	1.355	2.488
RNU7-171P	-0.41	0.152	-2.701	0.007	0.663	0.101	-3.34	0.001	0.492	0.893
TOR1B	0.496	0.154	3.216	0.001	1.642	0.253	2.536	0.011	1.214	2.221
SURF4	0.426	0.153	2.79	0.005	1.531	0.234	2.272	0.023	1.135	2.064
MAN1B1-DT	0.455	0.155	2.942	0.003	1.576	0.244	2.364	0.018	1.164	2.133
MAN1B1	0.452	0.152	2.969	0.003	1.572	0.24	2.388	0.017	1.166	2.119
LINC00702	0.498	0.154	3.227	0.001	1.645	0.254	2.542	0.011	1.216	2.227
GATA3-AS1	-0.409	0.153	-2.677	0.007	0.664	0.102	-3.308	0.001	0.492	0.896
AL390294.1	-0.526	0.154	-3.41	0.001	0.591	0.091	-4.486	0	0.437	0.8
SFTA1P	0.451	0.153	2.95	0.003	1.57	0.24	2.374	0.018	1.163	2.119
ECHDC3	0.488	0.152	3.203	0.001	1.63	0.249	2.534	0.011	1.209	2.198
RNU6-1095P	-0.406	0.152	-2.668	0.008	0.666	0.101	-3.291	0.001	0.495	0.898
AL157392.4	-0.411	0.153	-2.687	0.007	0.663	0.101	-3.323	0.001	0.492	0.895
AL450384.2	-0.549	0.154	-3.568	0	0.578	0.089	-4.753	0	0.427	0.781
ENKUR	0.421	0.153	2.753	0.006	1.524	0.233	2.247	0.025	1.129	2.058
SVIL	0.61	0.156	3.912	0	1.84	0.287	2.929	0.003	1.355	2.497
AL022344.1	0.423	0.153	2.757	0.006	1.526	0.234	2.249	0.025	1.13	2.061
AL353801.3	-0.403	0.153	-2.637	0.008	0.668	0.102	-3.247	0.001	0.495	0.902
ALOX5	-0.445	0.153	-2.902	0.004	0.641	0.098	-3.655	0	0.475	0.866
AL731567.1	-0.402	0.152	-2.637	0.008	0.669	0.102	-3.246	0.001	0.496	0.902
AGAP9	-0.423	0.152	-2.78	0.005	0.655	0.1	-3.46	0.001	0.486	0.883
FRMPD2	-0.447	0.153	-2.917	0.004	0.64	0.098	-3.677	0	0.474	0.864
VSTM4	0.465	0.153	3.032	0.002	1.593	0.244	2.425	0.015	1.179	2.152
AGAP6	-0.458	0.152	-3.006	0.003	0.632	0.096	-3.814	0	0.469	0.853
A1CF	-0.41	0.153	-2.679	0.007	0.664	0.102	-3.312	0.001	0.492	0.896
PRKG1	0.546	0.155	3.511	0	1.726	0.268	2.706	0.007	1.273	2.341
EGR2	0.405	0.154	2.637	0.008	1.5	0.23	2.168	0.03	1.11	2.027
SLC29A3	-0.412	0.154	-2.676	0.007	0.662	0.102	-3.311	0.001	0.49	0.896
AC091769.1	-0.474	0.154	-3.067	0.002	0.623	0.096	-3.924	0	0.46	0.843
AC022400.9	-0.445	0.153	-2.912	0.004	0.641	0.098	-3.668	0	0.475	0.865
ZSWIM8-AS1	-0.438	0.153	-2.867	0.004	0.645	0.099	-3.598	0	0.478	0.871
VCL	0.417	0.153	2.715	0.007	1.517	0.233	2.221	0.026	1.123	2.05
KCNMA1	0.413	0.154	2.685	0.007	1.512	0.233	2.199	0.028	1.118	2.044
ZMIZ1-AS1	-0.476	0.153	-3.105	0.002	0.621	0.095	-3.977	0	0.46	0.839
AL731569.1	-0.426	0.153	-2.793	0.005	0.653	0.1	-3.483	0	0.484	0.881
PAPSS2	0.417	0.154	2.714	0.007	1.518	0.233	2.219	0.027	1.123	2.052
PCGF5	-0.419	0.152	-2.761	0.006	0.657	0.1	-3.43	0.001	0.488	0.885
ACSM6	-0.449	0.154	-2.924	0.003	0.638	0.098	-3.692	0	0.472	0.862
ZNF518A	-0.405	0.152	-2.663	0.008	0.667	0.101	-3.283	0.001	0.495	0.899
BLNK	-0.474	0.153	-3.102	0.002	0.623	0.095	-3.968	0	0.462	0.84
NPM1P25	-0.574	0.154	-3.731	0	0.563	0.087	-5.04	0	0.417	0.762
LCOR	-0.46	0.153	-3.003	0.003	0.631	0.097	-3.812	0	0.468	0.852
ZFYVE27	-0.403	0.152	-2.642	0.008	0.668	0.102	-3.253	0.001	0.496	0.901
MIR4685	-0.463	0.152	-3.041	0.002	0.63	0.096	-3.866	0	0.467	0.848
AL391684.1	-0.395	0.152	-2.595	0.009	0.674	0.103	-3.182	0.001	0.5	0.908
DNMBP	-0.402	0.153	-2.627	0.009	0.669	0.102	-3.234	0.001	0.495	0.903
SEC31B	-0.464	0.153	-3.026	0.002	0.629	0.096	-3.851	0	0.465	0.849
ITPRIP	0.433	0.154	2.817	0.005	1.541	0.237	2.287	0.022	1.141	2.083
SORCS1	0.547	0.153	3.564	0	1.728	0.265	2.745	0.006	1.279	2.334
ADRA2A	0.475	0.154	3.093	0.002	1.608	0.247	2.462	0.014	1.19	2.173
AL157786.1	-0.472	0.153	-3.075	0.002	0.624	0.096	-3.929	0	0.462	0.843
AL158212.2	-0.417	0.152	-2.74	0.006	0.659	0.1	-3.4	0.001	0.489	0.888
PLEKHS1	-0.475	0.154	-3.088	0.002	0.622	0.096	-3.952	0	0.46	0.841
SHTN1	0.484	0.153	3.157	0.002	1.623	0.249	2.502	0.012	1.201	2.192
AL731566.2	-0.415	0.152	-2.724	0.006	0.661	0.101	-3.376	0.001	0.49	0.89
HTRA1	0.725	0.157	4.618	0	2.065	0.324	3.284	0.001	1.518	2.81
CPXM2	0.503	0.155	3.243	0.001	1.653	0.256	2.549	0.011	1.22	2.24
AL158835.1	-0.569	0.154	-3.696	0	0.566	0.087	-4.977	0	0.419	0.766
ADAM12	0.429	0.155	2.77	0.006	1.536	0.238	2.252	0.024	1.134	2.082
DPYSL4	0.406	0.153	2.655	0.008	1.5	0.229	2.183	0.029	1.112	2.024
MTG1	-0.398	0.152	-2.615	0.009	0.672	0.102	-3.211	0.001	0.499	0.905
SPRN	-0.474	0.154	-3.085	0.002	0.622	0.096	-3.947	0	0.46	0.841
SIGIRR	-0.612	0.156	-3.935	0	0.542	0.084	-5.429	0	0.4	0.735
ANO9	-0.408	0.153	-2.672	0.008	0.665	0.101	-3.299	0.001	0.493	0.897
AP006621.5	-0.397	0.152	-2.611	0.009	0.673	0.102	-3.204	0.001	0.499	0.906
ZNF195	-0.638	0.155	-4.12	0	0.529	0.082	-5.764	0	0.39	0.716
DCHS1	0.467	0.154	3.028	0.002	1.595	0.246	2.42	0.016	1.179	2.158
PPFIBP2	-0.609	0.158	-3.868	0	0.544	0.086	-5.327	0	0.399	0.74
LINC02709	0.447	0.153	2.913	0.004	1.564	0.24	2.349	0.019	1.158	2.113
ZBED5	-0.427	0.153	-2.794	0.005	0.652	0.1	-3.486	0	0.483	0.88
SPON1	0.425	0.154	2.764	0.006	1.53	0.235	2.252	0.024	1.132	2.068
RNU7-49P	-0.417	0.153	-2.728	0.006	0.659	0.101	-3.384	0.001	0.489	0.889
TPH1	-0.555	0.154	-3.603	0	0.574	0.088	-4.816	0	0.425	0.777
E2F8	-0.399	0.152	-2.616	0.009	0.671	0.102	-3.214	0.001	0.498	0.905
ARL14EP	-0.423	0.153	-2.773	0.006	0.655	0.1	-3.452	0.001	0.486	0.883
IMMP1L	-0.421	0.153	-2.751	0.006	0.656	0.1	-3.421	0.001	0.486	0.886
AC087783.1	-0.41	0.153	-2.68	0.007	0.663	0.102	-3.314	0.001	0.491	0.896
PEX16	-0.418	0.154	-2.708	0.007	0.658	0.102	-3.362	0.001	0.486	0.891
NDUFS3	-0.454	0.154	-2.944	0.003	0.635	0.098	-3.726	0	0.47	0.859
AGBL2	-0.399	0.153	-2.606	0.009	0.671	0.103	-3.203	0.001	0.497	0.906
PRPF19	0.423	0.152	2.777	0.005	1.526	0.232	2.265	0.023	1.132	2.056
TMEM109	0.473	0.154	3.074	0.002	1.604	0.247	2.449	0.014	1.187	2.169
FADS1	0.588	0.155	3.801	0	1.801	0.279	2.874	0.004	1.33	2.439
RAB3IL1	0.426	0.154	2.769	0.006	1.531	0.235	2.255	0.024	1.133	2.069
AHNAK	0.648	0.155	4.17	0	1.911	0.297	3.07	0.002	1.41	2.591
GANAB	0.429	0.153	2.807	0.005	1.536	0.235	2.282	0.022	1.138	2.073
PLAAT5	0.451	0.153	2.949	0.003	1.57	0.24	2.373	0.018	1.163	2.119
AP001462.1	-0.475	0.154	-3.084	0.002	0.622	0.096	-3.948	0	0.46	0.841
SNX15	-0.485	0.153	-3.169	0.002	0.616	0.094	-4.079	0	0.456	0.831
SLC22A20P	-0.4	0.153	-2.61	0.009	0.671	0.103	-3.209	0.001	0.497	0.905
AP001107.5	0.426	0.154	2.773	0.006	1.531	0.235	2.258	0.024	1.133	2.069
RAD9A	-0.476	0.153	-3.102	0.002	0.621	0.095	-3.973	0	0.46	0.839
UNC93B5	-0.541	0.154	-3.524	0	0.582	0.089	-4.676	0	0.431	0.786
TCIRG1	-0.61	0.155	-3.932	0	0.543	0.084	-5.418	0	0.401	0.736
MIR6753	-0.406	0.153	-2.66	0.008	0.666	0.102	-3.282	0.001	0.494	0.899
AP002807.1	-0.481	0.153	-3.139	0.002	0.618	0.095	-4.03	0	0.458	0.835
KRTAP5-8	-0.408	0.154	-2.654	0.008	0.665	0.102	-3.277	0.001	0.492	0.899
KRTAP5-10	-0.418	0.155	-2.705	0.007	0.658	0.102	-3.358	0.001	0.486	0.891
PDE2A	0.453	0.152	2.978	0.003	1.573	0.239	2.395	0.017	1.168	2.12
UCP3	-0.482	0.154	-3.121	0.002	0.618	0.095	-4.01	0	0.456	0.836
P4HA3	0.422	0.154	2.747	0.006	1.525	0.234	2.241	0.025	1.129	2.061
CHRDL2	0.41	0.154	2.665	0.008	1.507	0.232	2.186	0.029	1.114	2.037
AP001189.3	0.42	0.154	2.724	0.006	1.521	0.234	2.225	0.026	1.125	2.058
LRRC32	0.493	0.154	3.205	0.001	1.638	0.252	2.53	0.011	1.211	2.214
THRSP	-0.435	0.153	-2.849	0.004	0.647	0.099	-3.569	0	0.48	0.873
AP001767.3	-0.618	0.156	-3.968	0	0.539	0.084	-5.491	0	0.397	0.731
AP000873.4	-0.428	0.153	-2.797	0.005	0.652	0.1	-3.492	0	0.483	0.88
EED	-0.419	0.152	-2.747	0.006	0.658	0.1	-3.411	0.001	0.488	0.887
SETP17	-0.512	0.153	-3.342	0.001	0.6	0.092	-4.364	0	0.444	0.809
ENDOD1	0.563	0.154	3.659	0	1.756	0.27	2.798	0.005	1.299	2.374
BUD13P1	0.421	0.153	2.758	0.006	1.524	0.233	2.251	0.024	1.13	2.056
PDGFD	0.423	0.152	2.778	0.005	1.527	0.233	2.265	0.024	1.133	2.058
POGLUT3	0.465	0.154	3.025	0.002	1.592	0.245	2.419	0.016	1.178	2.153
C11orf87	0.465	0.153	3.038	0.002	1.592	0.244	2.429	0.015	1.18	2.15
CRYAB	0.65	0.156	4.167	0	1.915	0.299	3.065	0.002	1.411	2.599
DIXDC1	0.483	0.154	3.137	0.002	1.621	0.25	2.488	0.013	1.199	2.192
NCAM1	0.555	0.155	3.583	0	1.741	0.27	2.75	0.006	1.286	2.359
DRD2	0.398	0.153	2.604	0.009	1.489	0.228	2.148	0.032	1.103	2.009
REXO2	0.424	0.153	2.771	0.006	1.528	0.234	2.259	0.024	1.132	2.062
TAGLN	0.477	0.155	3.072	0.002	1.612	0.25	2.442	0.015	1.189	2.186
AP000892.4	0.467	0.155	3.019	0.003	1.595	0.247	2.412	0.016	1.178	2.159
BACE1	0.462	0.154	3.008	0.003	1.587	0.244	2.409	0.016	1.175	2.144
FXYD6	0.464	0.154	3.011	0.003	1.59	0.245	2.409	0.016	1.176	2.15
SCN4B	0.514	0.153	3.353	0.001	1.672	0.256	2.622	0.009	1.238	2.257
ARCN1	0.402	0.153	2.628	0.009	1.494	0.228	2.164	0.03	1.107	2.016
PDZD3	-0.399	0.153	-2.602	0.009	0.671	0.103	-3.197	0.001	0.497	0.906
RNF26	0.467	0.153	3.047	0.002	1.596	0.245	2.434	0.015	1.181	2.155
MIR100HG	0.535	0.155	3.444	0.001	1.708	0.265	2.667	0.008	1.259	2.316
AP000866.5	-0.433	0.154	-2.816	0.005	0.648	0.1	-3.524	0	0.48	0.877
CDON	0.403	0.153	2.631	0.009	1.496	0.229	2.166	0.03	1.108	2.019
BARX2	0.412	0.152	2.707	0.007	1.51	0.23	2.218	0.027	1.121	2.036
ADAMTS15	0.5	0.153	3.272	0.001	1.649	0.252	2.574	0.01	1.222	2.225
JAM3	0.502	0.154	3.26	0.001	1.651	0.254	2.563	0.01	1.221	2.233
WASH8P	-0.489	0.154	-3.177	0.001	0.613	0.094	-4.097	0	0.454	0.829
SLC6A12	-0.497	0.154	-3.225	0.001	0.609	0.094	-4.177	0	0.45	0.823
ERC1	0.452	0.153	2.946	0.003	1.572	0.241	2.37	0.018	1.163	2.123
AC005841.1	-0.409	0.152	-2.685	0.007	0.664	0.101	-3.318	0.001	0.493	0.895
TSPAN9	0.423	0.153	2.757	0.006	1.526	0.234	2.248	0.025	1.13	2.062
AC005912.1	-0.425	0.152	-2.792	0.005	0.654	0.1	-3.479	0.001	0.485	0.881
AC005840.4	-0.481	0.153	-3.135	0.002	0.618	0.095	-4.026	0	0.458	0.835
AC125494.1	-0.543	0.154	-3.535	0	0.581	0.089	-4.694	0	0.43	0.785
PTPN6	-0.8	0.158	-5.058	0	0.449	0.071	-7.75	0	0.329	0.613
MFAP5	0.413	0.155	2.672	0.008	1.512	0.234	2.188	0.029	1.116	2.048
LINC02367	-0.421	0.153	-2.76	0.006	0.656	0.1	-3.432	0.001	0.486	0.885
CLEC2D	-0.62	0.154	-4.026	0	0.538	0.083	-5.579	0	0.398	0.727
AC022075.1	-0.448	0.153	-2.935	0.003	0.639	0.097	-3.702	0	0.474	0.862
KLRK1	-0.624	0.154	-4.056	0	0.536	0.082	-5.631	0	0.396	0.724
KLRA1P	-0.526	0.153	-3.437	0.001	0.591	0.09	-4.521	0	0.438	0.798
BCL2L14	-0.614	0.155	-3.969	0	0.541	0.084	-5.48	0	0.4	0.733
PTMAP9	-0.47	0.153	-3.063	0.002	0.625	0.096	-3.91	0	0.463	0.844
EMP1	0.612	0.155	3.961	0	1.845	0.285	2.962	0.003	1.362	2.497
AC010168.2	-0.558	0.154	-3.624	0	0.573	0.088	-4.852	0	0.424	0.774
H4-16	-0.401	0.152	-2.636	0.008	0.67	0.102	-3.243	0.001	0.497	0.902
ARHGDIB	-0.396	0.153	-2.594	0.009	0.673	0.103	-3.183	0.001	0.499	0.908
ABCC9	0.546	0.155	3.528	0	1.726	0.267	2.719	0.007	1.275	2.338
C2CD5	-0.43	0.152	-2.83	0.005	0.65	0.099	-3.536	0	0.483	0.876
AC092794.1	-0.551	0.154	-3.582	0	0.576	0.089	-4.779	0	0.426	0.779
BHLHE41	-0.523	0.154	-3.399	0.001	0.593	0.091	-4.467	0	0.438	0.801
AC092747.2	-0.398	0.152	-2.619	0.009	0.672	0.102	-3.216	0.001	0.499	0.905
AC016957.2	-0.42	0.153	-2.743	0.006	0.657	0.101	-3.409	0.001	0.487	0.887
FGD4	0.459	0.153	2.998	0.003	1.583	0.243	2.404	0.016	1.172	2.137
CNTN1	0.407	0.154	2.648	0.008	1.503	0.231	2.175	0.03	1.112	2.031
PDZRN4	0.407	0.153	2.651	0.008	1.502	0.23	2.178	0.029	1.112	2.028
PCED1B	-0.419	0.153	-2.734	0.006	0.658	0.101	-3.395	0.001	0.487	0.888
LINC02416	-0.421	0.153	-2.748	0.006	0.657	0.101	-3.417	0.001	0.486	0.886
AC121338.1	-0.498	0.153	-3.264	0.001	0.608	0.093	-4.231	0	0.45	0.819
OR8T1P	-0.406	0.152	-2.66	0.008	0.667	0.102	-3.28	0.001	0.494	0.899
ADCY6-DT	-0.514	0.154	-3.333	0.001	0.598	0.092	-4.356	0	0.442	0.809
CACNB3	-0.401	0.153	-2.621	0.009	0.67	0.102	-3.224	0.001	0.496	0.904
LMBR1L	-0.401	0.153	-2.617	0.009	0.669	0.103	-3.22	0.001	0.496	0.904
PRPH	0.531	0.154	3.453	0.001	1.7	0.261	2.679	0.007	1.258	2.298
RNU6-834P	-0.426	0.152	-2.8	0.005	0.653	0.099	-3.491	0	0.485	0.88
FAIM2	0.449	0.154	2.922	0.003	1.567	0.241	2.353	0.019	1.159	2.119
KRT7-AS	-0.521	0.154	-3.394	0.001	0.594	0.091	-4.454	0	0.44	0.802
AC068888.2	-0.404	0.152	-2.658	0.008	0.667	0.102	-3.276	0.001	0.495	0.899
CSAD	-0.619	0.155	-3.982	0	0.539	0.084	-5.512	0	0.397	0.73
ITGB7	-0.429	0.152	-2.823	0.005	0.651	0.099	-3.526	0	0.483	0.877
AC023794.2	-0.446	0.154	-2.903	0.004	0.64	0.098	-3.659	0	0.474	0.865
FAM242C	-0.416	0.154	-2.712	0.007	0.659	0.101	-3.364	0.001	0.488	0.891
ITGA7	0.526	0.154	3.42	0.001	1.692	0.26	2.66	0.008	1.252	2.287
TMEM198B	-0.469	0.153	-3.063	0.002	0.626	0.096	-3.909	0	0.463	0.845
OLA1P3	-0.409	0.153	-2.681	0.007	0.664	0.101	-3.313	0.001	0.492	0.896
PYM1	-0.452	0.153	-2.947	0.003	0.636	0.098	-3.726	0	0.471	0.859
IL23A	-0.423	0.153	-2.767	0.006	0.655	0.1	-3.445	0.001	0.485	0.884
LRP1	0.74	0.157	4.717	0	2.096	0.329	3.333	0.001	1.541	2.851
ARHGEF25	0.426	0.154	2.769	0.006	1.531	0.235	2.255	0.024	1.132	2.069
AVIL	-0.411	0.152	-2.702	0.007	0.663	0.101	-3.342	0.001	0.492	0.893
AC025165.5	-0.477	0.153	-3.122	0.002	0.62	0.095	-4.001	0	0.46	0.837
AC025165.4	-0.567	0.154	-3.676	0	0.567	0.087	-4.947	0	0.419	0.767
LINC01465	0.44	0.153	2.876	0.004	1.553	0.238	2.326	0.02	1.15	2.096
AVPR1A	0.403	0.152	2.641	0.008	1.496	0.228	2.174	0.03	1.109	2.017
XPOT	0.4	0.153	2.624	0.009	1.492	0.228	2.163	0.031	1.107	2.012
MSRB3	0.551	0.154	3.572	0	1.735	0.268	2.746	0.006	1.282	2.348
RPSAP52	0.405	0.153	2.647	0.008	1.499	0.229	2.177	0.029	1.111	2.022
HMGA2-AS1	0.425	0.153	2.768	0.006	1.529	0.235	2.256	0.024	1.132	2.065
AC020656.2	-0.501	0.154	-3.255	0.001	0.606	0.093	-4.224	0	0.448	0.819
PRANCR	-0.421	0.153	-2.756	0.006	0.656	0.1	-3.427	0.001	0.486	0.885
PTPRR	-0.422	0.153	-2.754	0.006	0.655	0.101	-3.427	0.001	0.485	0.885
FAHD2P1	-0.55	0.155	-3.56	0	0.577	0.089	-4.747	0	0.426	0.781
ACSS3	0.486	0.154	3.156	0.002	1.625	0.25	2.5	0.012	1.202	2.197
RASSF9	0.407	0.153	2.659	0.008	1.502	0.23	2.185	0.029	1.113	2.026
AC010201.2	-0.45	0.153	-2.948	0.003	0.637	0.097	-3.723	0	0.472	0.86
POC1B-AS1	-0.456	0.153	-2.984	0.003	0.634	0.097	-3.781	0	0.47	0.855
AC025034.1	-0.471	0.153	-3.073	0.002	0.625	0.096	-3.924	0	0.463	0.843
DCN	0.409	0.154	2.649	0.008	1.505	0.232	2.174	0.03	1.112	2.036
UBE2N	-0.405	0.152	-2.661	0.008	0.667	0.102	-3.281	0.001	0.495	0.899
AC012464.3	-0.427	0.153	-2.78	0.005	0.653	0.1	-3.467	0.001	0.483	0.882
NR2C1	-0.52	0.153	-3.398	0.001	0.594	0.091	-4.458	0	0.44	0.802
MIR3685	-0.451	0.152	-2.958	0.003	0.637	0.097	-3.738	0	0.472	0.859
PGAM1P5	-0.406	0.153	-2.657	0.008	0.666	0.102	-3.278	0.001	0.494	0.899
NTN4	-0.48	0.153	-3.133	0.002	0.619	0.095	-4.021	0	0.458	0.835
GOLGA2P5	-0.396	0.153	-2.594	0.009	0.673	0.103	-3.182	0.001	0.499	0.908
AC063948.1	-0.426	0.153	-2.79	0.005	0.653	0.1	-3.48	0.001	0.484	0.881
IGF1	0.503	0.154	3.268	0.001	1.653	0.254	2.568	0.01	1.223	2.234
ALDH1L2	0.51	0.154	3.308	0.001	1.666	0.257	2.591	0.01	1.231	2.254
CASC18	0.432	0.153	2.82	0.005	1.541	0.236	2.289	0.022	1.141	2.081
ALKBH2	-0.476	0.154	-3.088	0.002	0.621	0.096	-3.954	0	0.459	0.84
AC084876.1	-0.43	0.152	-2.821	0.005	0.651	0.099	-3.525	0	0.483	0.877
RPS2P41	-0.408	0.152	-2.68	0.007	0.665	0.101	-3.31	0.001	0.493	0.896
OAS1	-0.55	0.153	-3.585	0	0.577	0.089	-4.78	0	0.427	0.779
AC004551.1	-0.503	0.153	-3.276	0.001	0.605	0.093	-4.256	0	0.448	0.817
TBX3	-0.486	0.154	-3.153	0.002	0.615	0.095	-4.059	0	0.455	0.832
AC078880.5	-0.409	0.153	-2.666	0.008	0.665	0.102	-3.293	0.001	0.492	0.897
AC026367.2	-0.43	0.152	-2.823	0.005	0.65	0.099	-3.527	0	0.482	0.877
PLA2G1B	-0.482	0.153	-3.147	0.002	0.618	0.095	-4.043	0	0.458	0.834
LINC01089	-0.437	0.153	-2.865	0.004	0.646	0.099	-3.594	0	0.479	0.871
AC084018.1	-0.423	0.152	-2.784	0.005	0.655	0.1	-3.467	0.001	0.486	0.882
AC084018.2	-0.405	0.152	-2.661	0.008	0.667	0.101	-3.281	0.001	0.495	0.899
CCDC62	-0.417	0.153	-2.726	0.006	0.659	0.101	-3.383	0.001	0.488	0.889
AC026362.1	-0.412	0.152	-2.706	0.007	0.662	0.101	-3.35	0.001	0.491	0.893
TMED2-DT	-0.437	0.153	-2.863	0.004	0.646	0.099	-3.591	0	0.479	0.871
AC068790.4	-0.401	0.153	-2.624	0.009	0.67	0.102	-3.228	0.001	0.496	0.904
ADGRD1	0.415	0.154	2.699	0.007	1.514	0.233	2.209	0.027	1.12	2.047
SPATA13	-0.449	0.152	-2.944	0.003	0.639	0.097	-3.715	0	0.474	0.861
MTIF3	-0.423	0.153	-2.759	0.006	0.655	0.1	-3.434	0.001	0.485	0.885
N4BP2L1	-0.436	0.153	-2.854	0.004	0.647	0.099	-3.576	0	0.48	0.872
LINC00571	0.397	0.153	2.596	0.009	1.487	0.227	2.143	0.032	1.102	2.007
LHFPL6	0.513	0.153	3.34	0.001	1.67	0.256	2.614	0.009	1.236	2.255
LINC00562	-0.431	0.153	-2.819	0.005	0.65	0.099	-3.524	0	0.482	0.877
PHF11	-0.462	0.152	-3.028	0.002	0.63	0.096	-3.848	0	0.468	0.85
TDRD3	-0.413	0.152	-2.714	0.007	0.661	0.101	-3.36	0.001	0.491	0.892
PCDH9	0.414	0.153	2.708	0.007	1.513	0.231	2.218	0.027	1.121	2.041
AL137244.1	-0.427	0.153	-2.802	0.005	0.652	0.099	-3.496	0	0.484	0.879
PTMAP5	-0.636	0.157	-4.061	0	0.529	0.083	-5.675	0	0.39	0.72
AL136526.1	-0.45	0.153	-2.944	0.003	0.638	0.097	-3.717	0	0.473	0.86
AL138689.1	0.507	0.154	3.301	0.001	1.66	0.255	2.59	0.01	1.229	2.243
ARGLU1	-0.463	0.153	-3.029	0.002	0.629	0.096	-3.853	0	0.466	0.849
COL4A2	0.427	0.154	2.783	0.005	1.533	0.235	2.265	0.024	1.135	2.072
AL139385.1	0.469	0.154	3.05	0.002	1.598	0.246	2.435	0.015	1.182	2.16
ANKRD10	-0.506	0.153	-3.306	0.001	0.603	0.092	-4.305	0	0.446	0.814
MCF2L	-0.568	0.154	-3.688	0	0.566	0.087	-4.966	0	0.419	0.766
AL356740.3	-0.452	0.154	-2.939	0.003	0.636	0.098	-3.716	0	0.471	0.86
GAS6	0.508	0.155	3.287	0.001	1.662	0.257	2.577	0.01	1.228	2.25
GAS6-DT	0.469	0.155	3.03	0.002	1.598	0.247	2.418	0.016	1.18	2.165
TRAV36DV7	-0.401	0.152	-2.636	0.008	0.67	0.102	-3.243	0.001	0.497	0.902
HAUS4	0.445	0.155	2.881	0.004	1.561	0.241	2.325	0.02	1.153	2.113
ZFHX2-AS1	-0.531	0.154	-3.452	0.001	0.588	0.09	-4.556	0	0.435	0.795
AL135999.1	-0.406	0.152	-2.665	0.008	0.666	0.102	-3.288	0.001	0.494	0.898
NRL	-0.409	0.152	-2.684	0.007	0.665	0.101	-3.315	0.001	0.493	0.896
AL136295.2	-0.539	0.154	-3.505	0	0.583	0.09	-4.644	0	0.432	0.789
IRF9	-0.451	0.152	-2.963	0.003	0.637	0.097	-3.744	0	0.473	0.858
REC8	-0.4	0.152	-2.634	0.008	0.67	0.102	-3.238	0.001	0.498	0.903
CTSG	0.466	0.153	3.046	0.002	1.593	0.244	2.435	0.015	1.181	2.15
STXBP6	0.427	0.153	2.797	0.005	1.532	0.234	2.276	0.023	1.136	2.067
DTD2	0.481	0.155	3.111	0.002	1.618	0.25	2.47	0.014	1.195	2.19
ARHGAP5-AS1	0.461	0.153	3.021	0.003	1.586	0.242	2.42	0.016	1.176	2.14
AKAP6	0.445	0.154	2.892	0.004	1.561	0.241	2.333	0.02	1.154	2.112
SRP54	0.445	0.154	2.9	0.004	1.561	0.24	2.341	0.019	1.155	2.109
FOXA1	-0.455	0.153	-2.964	0.003	0.635	0.097	-3.752	0	0.47	0.857
SEC23A	0.486	0.154	3.16	0.002	1.626	0.25	2.503	0.012	1.203	2.198
LRFN5	0.416	0.154	2.712	0.007	1.517	0.233	2.218	0.027	1.122	2.049
PRPF39	-0.482	0.152	-3.16	0.002	0.618	0.094	-4.06	0	0.458	0.833
CDKL1	0.409	0.152	2.689	0.007	1.506	0.229	2.207	0.027	1.117	2.03
SAV1	0.418	0.154	2.715	0.007	1.519	0.234	2.219	0.027	1.123	2.054
PYGL	0.463	0.153	3.02	0.003	1.588	0.243	2.417	0.016	1.176	2.145
STYX	0.409	0.153	2.665	0.008	1.505	0.231	2.187	0.029	1.114	2.033
FERMT2	0.46	0.153	3.001	0.003	1.585	0.243	2.405	0.016	1.173	2.141
GCH1	-0.419	0.152	-2.753	0.006	0.658	0.1	-3.42	0.001	0.488	0.886
CCDC198	-0.406	0.154	-2.639	0.008	0.667	0.102	-3.254	0.001	0.493	0.901
DACT1	0.448	0.154	2.903	0.004	1.566	0.242	2.339	0.019	1.157	2.119
RHOJ	0.481	0.153	3.144	0.002	1.618	0.248	2.495	0.013	1.199	2.184
GPHN	0.542	0.154	3.515	0	1.72	0.265	2.713	0.007	1.271	2.327
FAM71D	-0.44	0.152	-2.893	0.004	0.644	0.098	-3.634	0	0.478	0.868
GALNT16	0.525	0.154	3.407	0.001	1.691	0.261	2.651	0.008	1.25	2.287
ADAM20P1	-0.44	0.153	-2.873	0.004	0.644	0.099	-3.609	0	0.477	0.869
AC004846.2	-0.522	0.155	-3.363	0.001	0.594	0.092	-4.415	0	0.438	0.804
LTBP2	0.49	0.154	3.181	0.001	1.633	0.252	2.514	0.012	1.207	2.209
TGFB3	0.406	0.153	2.65	0.008	1.501	0.23	2.178	0.029	1.112	2.027
AL049775.1	0.469	0.155	3.028	0.002	1.599	0.248	2.416	0.016	1.18	2.167
FLRT2	0.585	0.156	3.763	0	1.795	0.279	2.848	0.004	1.324	2.435
CALM1	0.502	0.153	3.278	0.001	1.653	0.253	2.577	0.01	1.224	2.232
C14orf132	0.416	0.153	2.722	0.006	1.515	0.231	2.227	0.026	1.123	2.044
HHIPL1	0.447	0.154	2.911	0.004	1.564	0.24	2.347	0.019	1.157	2.113
SLC25A29	-0.45	0.153	-2.943	0.003	0.638	0.097	-3.716	0	0.473	0.861
LINC00677	-0.517	0.153	-3.374	0.001	0.596	0.091	-4.418	0	0.442	0.805
LINC02280	-0.413	0.152	-2.715	0.007	0.661	0.101	-3.363	0.001	0.491	0.891
AHNAK2	0.506	0.155	3.277	0.001	1.659	0.256	2.571	0.01	1.226	2.246
AL928654.4	0.425	0.154	2.769	0.006	1.53	0.235	2.256	0.024	1.132	2.067
AL928654.2	-0.424	0.152	-2.787	0.005	0.655	0.1	-3.47	0.001	0.486	0.882
AC022613.2	0.421	0.153	2.759	0.006	1.523	0.232	2.252	0.024	1.13	2.054
AC135983.4	-0.447	0.153	-2.922	0.003	0.639	0.098	-3.685	0	0.474	0.863
AVEN	0.448	0.153	2.92	0.003	1.565	0.24	2.354	0.019	1.159	2.114
GOLGA8A	-0.437	0.152	-2.869	0.004	0.646	0.098	-3.597	0	0.479	0.871
ACTC1	0.464	0.154	3.006	0.003	1.591	0.246	2.405	0.016	1.175	2.153
AC116158.1	-0.44	0.153	-2.877	0.004	0.644	0.098	-3.613	0	0.478	0.869
AC023908.3	-0.437	0.152	-2.87	0.004	0.646	0.098	-3.599	0	0.479	0.871
AC091045.2	-0.568	0.154	-3.694	0	0.567	0.087	-4.973	0	0.419	0.766
RAD51-AS1	-0.41	0.152	-2.691	0.007	0.664	0.101	-3.327	0.001	0.492	0.895
RPAP1	0.422	0.153	2.762	0.006	1.525	0.233	2.254	0.024	1.13	2.057
EHD4-AS1	-0.414	0.153	-2.7	0.007	0.661	0.101	-3.345	0.001	0.489	0.893
ZNF106	0.426	0.153	2.778	0.005	1.531	0.235	2.262	0.024	1.134	2.067
MAP1A	0.623	0.157	3.976	0	1.864	0.292	2.96	0.003	1.371	2.533
STRC	-0.476	0.153	-3.105	0.002	0.622	0.095	-3.976	0	0.46	0.839
CATSPER2	-0.43	0.153	-2.81	0.005	0.65	0.1	-3.512	0	0.482	0.878
HYPK	-0.396	0.153	-2.594	0.009	0.673	0.103	-3.182	0.001	0.499	0.908
PATL2	-0.398	0.152	-2.616	0.009	0.672	0.102	-3.213	0.001	0.499	0.905
SEMA6D	0.49	0.153	3.195	0.001	1.632	0.25	2.526	0.012	1.209	2.205
AC084757.4	-0.461	0.153	-3.023	0.003	0.631	0.096	-3.841	0	0.468	0.85
AC013452.3	-0.514	0.153	-3.359	0.001	0.598	0.092	-4.392	0	0.443	0.807
TNFAIP8L3	0.479	0.153	3.126	0.002	1.614	0.247	2.484	0.013	1.196	2.18
AC009754.1	-0.402	0.152	-2.636	0.008	0.669	0.102	-3.244	0.001	0.496	0.902
AC084782.3	-0.509	0.155	-3.288	0.001	0.601	0.093	-4.286	0	0.444	0.814
AC010999.1	-0.417	0.152	-2.744	0.006	0.659	0.1	-3.404	0.001	0.489	0.888
AC087385.1	0.544	0.154	3.533	0	1.724	0.266	2.724	0.006	1.274	2.331
TPM1	0.5	0.155	3.221	0.001	1.648	0.256	2.535	0.011	1.216	2.234
USP3	-0.4	0.153	-2.619	0.009	0.67	0.102	-3.22	0.001	0.497	0.904
AC103691.1	-0.529	0.154	-3.438	0.001	0.589	0.091	-4.532	0	0.436	0.797
RASL12	0.429	0.153	2.805	0.005	1.535	0.235	2.281	0.023	1.138	2.071
SMAD6	-0.582	0.154	-3.789	0	0.559	0.086	-5.14	0	0.414	0.755
IQCH-AS1	-0.437	0.153	-2.856	0.004	0.646	0.099	-3.581	0	0.479	0.872
AC087639.1	-0.45	0.153	-2.949	0.003	0.637	0.097	-3.725	0	0.473	0.86
UACA	0.4	0.152	2.624	0.009	1.492	0.227	2.163	0.031	1.106	2.011
AC009690.2	-0.399	0.152	-2.627	0.009	0.671	0.102	-3.228	0.001	0.499	0.904
CD276	0.438	0.153	2.862	0.004	1.55	0.237	2.317	0.02	1.148	2.093
INSYN1	0.494	0.154	3.207	0.001	1.638	0.252	2.531	0.011	1.212	2.215
AC105137.2	-0.418	0.153	-2.733	0.006	0.658	0.101	-3.394	0.001	0.487	0.888
AC105020.5	-0.416	0.153	-2.717	0.007	0.66	0.101	-3.368	0.001	0.489	0.891
CSPG4	0.445	0.153	2.905	0.004	1.561	0.239	2.344	0.019	1.156	2.108
SCAPER	0.413	0.153	2.694	0.007	1.511	0.232	2.207	0.027	1.119	2.041
AC021483.2	-0.408	0.152	-2.677	0.007	0.665	0.101	-3.305	0.001	0.494	0.897
AC016705.2	-0.403	0.153	-2.638	0.008	0.669	0.102	-3.248	0.001	0.496	0.902
AC023302.1	-0.548	0.155	-3.534	0	0.578	0.09	-4.706	0	0.427	0.783
AC105339.5	-0.554	0.153	-3.611	0	0.575	0.088	-4.825	0	0.425	0.776
ADAMTSL3	0.628	0.156	4.023	0	1.874	0.293	2.987	0.003	1.38	2.545
RPL36AP43	-0.504	0.153	-3.292	0.001	0.604	0.092	-4.281	0	0.447	0.815
TTLL13P	-0.519	0.155	-3.356	0.001	0.595	0.092	-4.398	0	0.44	0.806
LINC00930	-0.47	0.155	-3.035	0.002	0.625	0.097	-3.874	0	0.461	0.847
AC091544.4	-0.509	0.155	-3.288	0.001	0.601	0.093	-4.287	0	0.444	0.814
RGMA	0.607	0.155	3.925	0	1.836	0.284	2.942	0.003	1.355	2.486
LINC01197	0.513	0.154	3.341	0.001	1.67	0.256	2.614	0.009	1.236	2.257
AC104260.2	0.484	0.153	3.175	0.001	1.623	0.248	2.516	0.012	1.204	2.189
MEF2A	0.429	0.153	2.802	0.005	1.535	0.235	2.279	0.023	1.137	2.072
AC027020.2	-0.442	0.153	-2.89	0.004	0.643	0.098	-3.634	0	0.477	0.867
AC090907.2	-0.432	0.153	-2.819	0.005	0.649	0.099	-3.526	0	0.481	0.877
WASH4P	-0.531	0.154	-3.434	0.001	0.588	0.091	-4.53	0	0.435	0.796
WASIR2	-0.713	0.157	-4.544	0	0.49	0.077	-6.63	0	0.36	0.667
IL9RP3	-0.621	0.155	-4.015	0	0.538	0.083	-5.565	0	0.397	0.728
LUC7L	-0.438	0.153	-2.866	0.004	0.645	0.099	-3.596	0	0.478	0.871
WFIKKN1	-0.474	0.155	-3.066	0.002	0.623	0.096	-3.921	0	0.46	0.843
AC120498.9	-0.462	0.153	-3.019	0.003	0.63	0.096	-3.838	0	0.466	0.85
CCDC154	-0.448	0.153	-2.94	0.003	0.639	0.097	-3.709	0	0.474	0.861
AL032819.2	-0.456	0.153	-2.975	0.003	0.634	0.097	-3.77	0	0.469	0.856
EME2	-0.454	0.153	-2.971	0.003	0.635	0.097	-3.76	0	0.471	0.857
BRICD5	-0.434	0.153	-2.836	0.005	0.648	0.099	-3.551	0	0.48	0.875
AC009065.9	-0.477	0.153	-3.115	0.002	0.621	0.095	-3.993	0	0.46	0.838
CLDN6	0.438	0.153	2.866	0.004	1.55	0.237	2.321	0.02	1.149	2.091
AC108134.1	-0.419	0.153	-2.73	0.006	0.658	0.101	-3.391	0.001	0.487	0.888
ZNF213-AS1	-0.499	0.153	-3.272	0.001	0.607	0.093	-4.244	0	0.45	0.819
DNASE1	-0.46	0.153	-2.999	0.003	0.631	0.097	-3.808	0	0.467	0.853
AC006111.3	-0.417	0.153	-2.727	0.006	0.659	0.101	-3.383	0.001	0.489	0.889
ADCY9	0.416	0.153	2.717	0.007	1.516	0.232	2.223	0.026	1.123	2.046
PAM16	-0.503	0.153	-3.282	0.001	0.605	0.093	-4.265	0	0.448	0.817
AC012676.3	-0.543	0.153	-3.541	0	0.581	0.089	-4.701	0	0.43	0.785
SMIM22	-0.42	0.154	-2.73	0.006	0.657	0.101	-3.393	0.001	0.486	0.888
AC020663.2	-0.467	0.154	-3.035	0.002	0.627	0.096	-3.868	0	0.464	0.848
AC099489.1	-0.499	0.153	-3.267	0.001	0.607	0.093	-4.237	0	0.45	0.819
SNX29	0.466	0.154	3.027	0.002	1.593	0.245	2.42	0.016	1.178	2.154
NOMO1	0.54	0.154	3.52	0	1.717	0.264	2.719	0.007	1.271	2.319
AC099518.4	-0.408	0.155	-2.632	0.008	0.665	0.103	-3.251	0.001	0.491	0.901
AC099518.2	-0.513	0.155	-3.303	0.001	0.598	0.093	-4.317	0	0.441	0.812
NPIPB3	-0.42	0.153	-2.75	0.006	0.657	0.1	-3.417	0.001	0.487	0.886
VWA3A	-0.42	0.153	-2.752	0.006	0.657	0.1	-3.419	0.001	0.487	0.886
MFSD13B	-0.417	0.152	-2.742	0.006	0.659	0.1	-3.404	0.001	0.489	0.888
RRN3P3	-0.442	0.152	-2.899	0.004	0.643	0.098	-3.645	0	0.477	0.867
AC008870.3	-0.44	0.153	-2.865	0.004	0.644	0.099	-3.598	0	0.477	0.87
ARHGAP17	0.408	0.154	2.648	0.008	1.504	0.232	2.174	0.03	1.112	2.035
ZKSCAN2-DT	-0.422	0.152	-2.769	0.006	0.656	0.1	-3.445	0.001	0.486	0.884
GTF3C1	0.433	0.153	2.83	0.005	1.541	0.236	2.297	0.022	1.142	2.08
XPO6	0.404	0.152	2.654	0.008	1.498	0.228	2.183	0.029	1.112	2.02
NPIPB6	-0.422	0.153	-2.76	0.006	0.656	0.1	-3.434	0.001	0.486	0.885
AC020765.2	-0.575	0.155	-3.72	0	0.563	0.087	-5.028	0	0.415	0.762
AC145285.6	-0.473	0.154	-3.081	0.002	0.623	0.096	-3.941	0	0.461	0.842
SH2B1	-0.509	0.154	-3.314	0.001	0.601	0.092	-4.321	0	0.445	0.812
LAT	-0.435	0.152	-2.855	0.004	0.647	0.099	-3.577	0	0.48	0.873
NPIPB10P	-0.602	0.155	-3.875	0	0.548	0.085	-5.316	0	0.404	0.743
AC009093.4	0.41	0.155	2.649	0.008	1.506	0.233	2.174	0.03	1.112	2.039
NPIPB11	-0.586	0.154	-3.79	0	0.557	0.086	-5.152	0	0.411	0.754
RNF40	0.414	0.153	2.709	0.007	1.513	0.231	2.218	0.027	1.121	2.042
AC135050.2	0.452	0.153	2.95	0.003	1.571	0.241	2.374	0.018	1.164	2.121
AC009088.1	-0.417	0.153	-2.727	0.006	0.659	0.101	-3.382	0.001	0.489	0.889
AC026471.4	-0.444	0.153	-2.898	0.004	0.642	0.098	-3.648	0	0.475	0.866
AC026471.6	0.46	0.154	2.99	0.003	1.584	0.244	2.397	0.017	1.172	2.141
TGFB1I1	0.423	0.154	2.741	0.006	1.526	0.235	2.235	0.025	1.128	2.065
CES1	0.404	0.153	2.638	0.008	1.497	0.229	2.171	0.03	1.109	2.02
MT1X	0.439	0.154	2.853	0.004	1.55	0.238	2.309	0.021	1.147	2.096
AC012181.2	-0.494	0.153	-3.222	0.001	0.61	0.094	-4.167	0	0.452	0.824
AC009090.1	-0.543	0.154	-3.53	0	0.581	0.089	-4.689	0	0.43	0.785
CCL17	-0.456	0.153	-2.971	0.003	0.634	0.097	-3.763	0	0.469	0.856
HMGB3P32	-0.427	0.152	-2.814	0.005	0.652	0.099	-3.511	0	0.484	0.878
AC010542.6	-0.559	0.155	-3.607	0	0.572	0.089	-4.833	0	0.422	0.775
AC027682.5	-0.427	0.153	-2.798	0.005	0.652	0.1	-3.49	0	0.484	0.88
AC027682.7	-0.433	0.152	-2.842	0.004	0.648	0.099	-3.557	0	0.481	0.874
AC040162.1	-0.688	0.156	-4.422	0	0.503	0.078	-6.361	0	0.371	0.682
SLC7A6	0.555	0.155	3.591	0	1.742	0.269	2.756	0.006	1.287	2.358
FTLP14	-0.457	0.153	-2.987	0.003	0.633	0.097	-3.787	0	0.469	0.855
AC009131.1	-0.403	0.153	-2.642	0.008	0.668	0.102	-3.255	0.001	0.495	0.901
AC009032.1	-0.443	0.153	-2.904	0.004	0.642	0.098	-3.654	0	0.476	0.866
AC009022.1	-0.505	0.153	-3.298	0.001	0.603	0.092	-4.292	0	0.447	0.815
NPIPB14P	-0.415	0.153	-2.712	0.007	0.661	0.101	-3.361	0.001	0.49	0.891
FCSK	-0.41	0.153	-2.681	0.007	0.663	0.102	-3.314	0.001	0.491	0.896
ATXN1L	0.477	0.155	3.078	0.002	1.611	0.25	2.448	0.014	1.189	2.183
AC009120.2	-0.528	0.153	-3.459	0.001	0.589	0.09	-4.558	0	0.437	0.795
GLG1	0.437	0.153	2.853	0.004	1.549	0.237	2.311	0.021	1.147	2.091
TMEM170A	-0.401	0.153	-2.621	0.009	0.67	0.102	-3.224	0.001	0.496	0.904
ADAMTS18	0.563	0.154	3.661	0	1.756	0.27	2.8	0.005	1.299	2.374
PLCG2	-0.4	0.153	-2.612	0.009	0.671	0.103	-3.211	0.001	0.497	0.905
JPH3	0.409	0.153	2.67	0.008	1.505	0.23	2.191	0.028	1.115	2.031
CPNE7	-0.491	0.153	-3.203	0.001	0.612	0.094	-4.136	0	0.453	0.826
CDK10	-0.414	0.154	-2.695	0.007	0.661	0.102	-3.339	0.001	0.489	0.893
RILP	-0.495	0.155	-3.199	0.001	0.61	0.094	-4.139	0	0.45	0.826
SERPINF1	0.407	0.153	2.658	0.008	1.502	0.23	2.184	0.029	1.113	2.028
AC116914.2	-0.531	0.154	-3.449	0.001	0.588	0.09	-4.55	0	0.435	0.795
ZFP3	-0.421	0.152	-2.767	0.006	0.656	0.1	-3.44	0.001	0.487	0.884
RPAIN	-0.466	0.155	-3.013	0.003	0.628	0.097	-3.838	0	0.464	0.85
AC004148.1	-0.434	0.153	-2.842	0.004	0.648	0.099	-3.56	0	0.48	0.874
AC016876.4	-0.422	0.153	-2.76	0.006	0.656	0.1	-3.434	0.001	0.486	0.885
AC016876.3	-0.438	0.154	-2.846	0.004	0.645	0.099	-3.572	0	0.477	0.872
MYHAS	0.413	0.154	2.681	0.007	1.511	0.232	2.197	0.028	1.117	2.042
AC005703.4	-0.405	0.153	-2.645	0.008	0.667	0.102	-3.261	0.001	0.494	0.9
COPS3	0.405	0.152	2.66	0.008	1.5	0.228	2.187	0.029	1.112	2.021
AC107982.2	-0.417	0.153	-2.717	0.007	0.659	0.101	-3.37	0.001	0.488	0.89
EPN2	0.579	0.154	3.766	0	1.785	0.275	2.858	0.004	1.32	2.413
MFAP4	0.471	0.154	3.06	0.002	1.601	0.246	2.441	0.015	1.184	2.164
AC005730.2	0.444	0.153	2.902	0.004	1.559	0.239	2.343	0.019	1.155	2.105
AC069366.1	0.404	0.152	2.656	0.008	1.498	0.228	2.185	0.029	1.112	2.019
SARM1	-0.409	0.153	-2.681	0.007	0.664	0.101	-3.312	0.001	0.493	0.896
AC005726.1	-0.468	0.154	-3.034	0.002	0.626	0.097	-3.868	0	0.463	0.847
PIGS	0.402	0.153	2.638	0.008	1.495	0.228	2.172	0.03	1.109	2.017
SPAG5-AS1	-0.502	0.153	-3.282	0.001	0.605	0.093	-4.263	0	0.448	0.817
AC010761.4	-0.413	0.153	-2.706	0.007	0.662	0.101	-3.349	0.001	0.491	0.892
AC024267.4	-0.537	0.154	-3.477	0.001	0.584	0.09	-4.604	0	0.432	0.791
AC104564.3	-0.7	0.154	-4.53	0	0.497	0.077	-6.559	0	0.367	0.672
EFCAB5	-0.447	0.153	-2.916	0.004	0.64	0.098	-3.677	0	0.474	0.864
AC104996.2	-0.492	0.154	-3.2	0.001	0.611	0.094	-4.133	0	0.452	0.826
TBC1D29P	-0.427	0.153	-2.798	0.005	0.653	0.1	-3.49	0	0.484	0.88
SUZ12P1	-0.424	0.152	-2.788	0.005	0.654	0.1	-3.473	0.001	0.486	0.882
MYO1D	0.41	0.154	2.67	0.008	1.507	0.231	2.191	0.028	1.115	2.036
SLFN14	-0.446	0.153	-2.911	0.004	0.64	0.098	-3.67	0	0.474	0.864
CCL15	-0.512	0.154	-3.314	0.001	0.599	0.093	-4.328	0	0.443	0.811
AC243830.2	-0.415	0.153	-2.713	0.007	0.66	0.101	-3.363	0.001	0.489	0.891
DUSP14	0.438	0.154	2.839	0.005	1.549	0.239	2.3	0.021	1.145	2.095
HNF1B	-0.526	0.154	-3.424	0.001	0.591	0.091	-4.506	0	0.437	0.798
GPR179	-0.474	0.153	-3.106	0.002	0.623	0.095	-3.974	0	0.462	0.84
SRCIN1	-0.484	0.154	-3.15	0.002	0.616	0.095	-4.051	0	0.456	0.833
GSDMB	-0.519	0.154	-3.365	0.001	0.595	0.092	-4.41	0	0.44	0.805
P3H4	0.412	0.153	2.698	0.007	1.51	0.231	2.211	0.027	1.119	2.038
NKIRAS2	0.411	0.153	2.687	0.007	1.508	0.231	2.204	0.028	1.118	2.035
CNTD1	-0.49	0.153	-3.196	0.001	0.613	0.094	-4.124	0	0.454	0.827
AOC2	-0.454	0.153	-2.96	0.003	0.635	0.097	-3.746	0	0.47	0.858
AOC3	0.521	0.155	3.362	0.001	1.683	0.261	2.621	0.009	1.243	2.281
NBR2	-0.504	0.154	-3.274	0.001	0.604	0.093	-4.256	0	0.447	0.817
ASB16-AS1	-0.479	0.153	-3.133	0.002	0.619	0.095	-4.019	0	0.459	0.836
AC003102.1	-0.477	0.154	-3.104	0.002	0.62	0.095	-3.979	0	0.459	0.839
AC142472.1	-0.416	0.153	-2.714	0.007	0.66	0.101	-3.365	0.001	0.489	0.891
ARHGAP27	-0.447	0.155	-2.889	0.004	0.639	0.099	-3.643	0	0.472	0.866
AC003070.1	-0.485	0.154	-3.14	0.002	0.616	0.095	-4.04	0	0.455	0.834
OSBPL7	-0.558	0.154	-3.633	0	0.572	0.088	-4.865	0	0.423	0.773
SCRN2	-0.402	0.153	-2.629	0.009	0.669	0.102	-3.237	0.001	0.495	0.903
AC004477.1	-0.428	0.153	-2.791	0.005	0.652	0.1	-3.483	0	0.483	0.88
SKAP1	-0.468	0.153	-3.051	0.002	0.626	0.096	-3.889	0	0.464	0.846
SKAP1-AS1	-0.424	0.155	-2.736	0.006	0.655	0.101	-3.407	0.001	0.483	0.887
HOXB3	-0.502	0.155	-3.241	0.001	0.605	0.094	-4.21	0	0.447	0.82
ANKRD40CL	-0.477	0.154	-3.1	0.002	0.621	0.095	-3.972	0	0.459	0.839
TMEM100	0.455	0.153	2.969	0.003	1.577	0.242	2.385	0.017	1.167	2.13
MSI2	-0.432	0.153	-2.829	0.005	0.649	0.099	-3.538	0	0.482	0.876
AC015813.1	-0.48	0.153	-3.134	0.002	0.619	0.095	-4.021	0	0.459	0.836
AC005962.1	-0.43	0.154	-2.802	0.005	0.65	0.1	-3.501	0	0.481	0.879
PRR11	0.421	0.153	2.756	0.006	1.523	0.233	2.25	0.024	1.129	2.055
LINC02875	-0.41	0.153	-2.685	0.007	0.663	0.101	-3.32	0.001	0.492	0.895
ARHGAP27P1-BPTFP1-KPNA2P3	-0.413	0.153	-2.698	0.007	0.662	0.101	-3.34	0.001	0.49	0.893
AC103810.3	-0.423	0.152	-2.777	0.005	0.655	0.1	-3.457	0.001	0.486	0.883
AC005332.3	-0.475	0.153	-3.101	0.002	0.622	0.095	-3.969	0	0.461	0.84
HID1	-0.428	0.153	-2.79	0.005	0.652	0.1	-3.482	0	0.483	0.88
MYO15B	-0.435	0.153	-2.841	0.004	0.647	0.099	-3.559	0	0.48	0.874
SMIM6	-0.436	0.154	-2.832	0.005	0.647	0.1	-3.55	0	0.478	0.874
GALK1	0.405	0.152	2.661	0.008	1.5	0.228	2.188	0.029	1.113	2.021
CDK3	-0.496	0.153	-3.243	0.001	0.609	0.093	-4.198	0	0.451	0.822
MXRA7	0.57	0.155	3.686	0	1.768	0.274	2.81	0.005	1.306	2.395
MFSD11	0.49	0.153	3.193	0.001	1.632	0.25	2.525	0.012	1.208	2.203
AC068594.1	-0.49	0.155	-3.164	0.002	0.613	0.095	-4.083	0	0.452	0.83
TNRC6C-AS1	-0.437	0.152	-2.868	0.004	0.646	0.098	-3.596	0	0.479	0.871
AC087741.1	-0.46	0.153	-3.011	0.003	0.631	0.096	-3.823	0	0.468	0.852
NPTX1	0.416	0.153	2.72	0.007	1.516	0.232	2.225	0.026	1.123	2.045
BAIAP2	0.54	0.153	3.525	0	1.716	0.263	2.724	0.006	1.271	2.318
AC145207.9	-0.489	0.153	-3.186	0.001	0.613	0.094	-4.108	0	0.454	0.829
MAFG-DT	0.406	0.153	2.646	0.008	1.501	0.23	2.175	0.03	1.111	2.028
AC132872.3	-0.413	0.153	-2.706	0.007	0.661	0.101	-3.351	0.001	0.49	0.892
AC132938.2	-0.451	0.154	-2.941	0.003	0.637	0.098	-3.717	0	0.471	0.86
HEXD	-0.464	0.153	-3.026	0.002	0.629	0.096	-3.85	0	0.466	0.849
NARF-IT1	-0.402	0.152	-2.645	0.008	0.669	0.102	-3.256	0.001	0.496	0.901
AP000894.2	0.517	0.153	3.378	0.001	1.677	0.257	2.638	0.008	1.242	2.263
METTL4	-0.453	0.153	-2.961	0.003	0.636	0.097	-3.746	0	0.471	0.858
CHORDC1P4	-0.451	0.153	-2.944	0.003	0.637	0.098	-3.719	0	0.472	0.86
RPL6P27	-0.434	0.153	-2.838	0.005	0.648	0.099	-3.554	0	0.48	0.874
AP001094.2	-0.483	0.153	-3.161	0.002	0.617	0.094	-4.065	0	0.457	0.832
AP001094.1	-0.534	0.155	-3.452	0.001	0.586	0.091	-4.563	0	0.433	0.794
AP001010.1	-0.416	0.152	-2.731	0.006	0.66	0.1	-3.388	0.001	0.489	0.889
AC006557.1	-0.554	0.155	-3.585	0	0.574	0.089	-4.792	0	0.424	0.778
ANKRD20A5P	-0.426	0.153	-2.787	0.005	0.653	0.1	-3.474	0.001	0.484	0.881
CYP4F35P	-0.415	0.153	-2.712	0.007	0.66	0.101	-3.361	0.001	0.489	0.891
AC106033.1	-0.55	0.153	-3.589	0	0.577	0.088	-4.785	0	0.427	0.779
ZNF521	0.501	0.155	3.237	0.001	1.651	0.256	2.546	0.011	1.219	2.236
CDH2	0.427	0.156	2.728	0.006	1.533	0.24	2.22	0.026	1.128	2.083
DTNA	0.453	0.154	2.939	0.003	1.573	0.242	2.363	0.018	1.163	2.128
MAPRE2	0.449	0.153	2.926	0.003	1.567	0.24	2.358	0.018	1.16	2.116
AC011815.2	-0.434	0.152	-2.857	0.004	0.648	0.098	-3.578	0	0.481	0.873
AC120049.1	0.399	0.152	2.621	0.009	1.49	0.227	2.162	0.031	1.106	2.008
SETBP1	0.552	0.154	3.582	0	1.736	0.267	2.753	0.006	1.284	2.348
DYM	0.54	0.155	3.486	0	1.716	0.266	2.694	0.007	1.267	2.325
DCC	-0.436	0.153	-2.848	0.004	0.647	0.099	-3.569	0	0.479	0.873
STARD6	0.452	0.153	2.957	0.003	1.571	0.24	2.379	0.017	1.165	2.12
TCF4	0.418	0.153	2.731	0.006	1.519	0.232	2.232	0.026	1.125	2.05
AC027097.2	0.406	0.153	2.647	0.008	1.5	0.23	2.176	0.03	1.111	2.026
KDSR	0.417	0.153	2.729	0.006	1.518	0.232	2.231	0.026	1.125	2.048
SERPINB2	0.459	0.154	2.986	0.003	1.583	0.243	2.394	0.017	1.171	2.14
SERPINB10	0.592	0.155	3.816	0	1.807	0.28	2.88	0.004	1.333	2.448
DSEL	0.499	0.154	3.25	0.001	1.647	0.253	2.559	0.011	1.219	2.225
DOK6	0.463	0.154	3.016	0.003	1.589	0.244	2.413	0.016	1.176	2.148
LINC00683	0.481	0.153	3.137	0.002	1.618	0.248	2.49	0.013	1.198	2.185
AC018529.1	0.467	0.153	3.055	0.002	1.595	0.244	2.441	0.015	1.182	2.153
PLPP2	-0.44	0.153	-2.87	0.004	0.644	0.099	-3.606	0	0.477	0.87
CBARP	0.471	0.154	3.061	0.002	1.601	0.246	2.442	0.015	1.184	2.164
AC004623.1	-0.461	0.153	-3.011	0.003	0.631	0.096	-3.824	0	0.468	0.851
GAMT	0.407	0.152	2.678	0.007	1.502	0.228	2.2	0.028	1.115	2.024
ADAMTSL5	0.411	0.153	2.691	0.007	1.508	0.23	2.207	0.027	1.118	2.034
AC012615.6	-0.528	0.154	-3.438	0.001	0.59	0.091	-4.529	0	0.436	0.797
TLE5	-0.483	0.154	-3.142	0.002	0.617	0.095	-4.039	0	0.456	0.834
AC005262.1	-0.429	0.153	-2.797	0.005	0.651	0.1	-3.493	0	0.482	0.879
HMG20B	-0.399	0.153	-2.615	0.009	0.671	0.102	-3.213	0.001	0.498	0.905
AC005954.1	-0.508	0.153	-3.325	0.001	0.601	0.092	-4.334	0	0.446	0.812
ANKRD24	-0.51	0.154	-3.299	0.001	0.601	0.093	-4.303	0	0.444	0.813
AC007292.1	-0.473	0.153	-3.088	0.002	0.623	0.095	-3.948	0	0.462	0.841
AC011498.3	-0.435	0.153	-2.849	0.004	0.647	0.099	-3.57	0	0.48	0.873
RPL32P34	-0.586	0.156	-3.751	0	0.556	0.087	-5.101	0	0.409	0.756
AC104532.2	-0.441	0.153	-2.882	0.004	0.644	0.098	-3.621	0	0.477	0.869
ACSBG2	-0.45	0.153	-2.934	0.003	0.638	0.098	-3.705	0	0.472	0.861
CRB3	-0.453	0.153	-2.962	0.003	0.636	0.097	-3.746	0	0.471	0.858
AC010503.5	-0.561	0.155	-3.617	0	0.571	0.088	-4.85	0	0.421	0.774
AC008760.1	-0.433	0.153	-2.831	0.005	0.649	0.099	-3.543	0	0.481	0.875
AC010323.2	-0.492	0.154	-3.193	0.001	0.611	0.094	-4.125	0	0.452	0.827
ZNF558	-0.486	0.153	-3.181	0.001	0.615	0.094	-4.095	0	0.456	0.83
OR7D2	-0.458	0.153	-2.988	0.003	0.633	0.097	-3.79	0	0.468	0.854
ZNF559-ZNF177	-0.591	0.154	-3.826	0	0.554	0.086	-5.216	0	0.409	0.75
AC011451.2	-0.413	0.152	-2.724	0.006	0.661	0.1	-3.374	0.001	0.491	0.891
ZNF266	-0.465	0.153	-3.043	0.002	0.628	0.096	-3.875	0	0.465	0.847
ZNF121	-0.521	0.154	-3.386	0.001	0.594	0.091	-4.443	0	0.44	0.803
ZNF812P	-0.444	0.153	-2.911	0.004	0.641	0.098	-3.665	0	0.475	0.865
AC008759.2	-0.419	0.153	-2.742	0.006	0.658	0.101	-3.405	0.001	0.487	0.887
UBE2L4	-0.567	0.155	-3.66	0	0.567	0.088	-4.925	0	0.419	0.768
SHFL	-0.521	0.153	-3.403	0.001	0.594	0.091	-4.466	0	0.44	0.802
P2RY11	-0.496	0.154	-3.224	0.001	0.609	0.094	-4.172	0	0.451	0.823
AC011511.1	-0.457	0.153	-2.988	0.003	0.633	0.097	-3.788	0	0.47	0.855
TYK2	-0.433	0.153	-2.835	0.005	0.649	0.099	-3.547	0	0.481	0.875
LDLR	0.468	0.153	3.06	0.002	1.597	0.244	2.444	0.015	1.183	2.154
AC011472.1	-0.402	0.152	-2.641	0.008	0.669	0.102	-3.251	0.001	0.496	0.901
ZNF653	-0.436	0.154	-2.834	0.005	0.647	0.099	-3.551	0	0.479	0.874
ZNF700	-0.4	0.153	-2.621	0.009	0.67	0.102	-3.223	0.001	0.497	0.904
ZNF44	-0.41	0.152	-2.691	0.007	0.664	0.101	-3.327	0.001	0.492	0.895
ZNF709	-0.457	0.153	-2.99	0.003	0.633	0.097	-3.792	0	0.469	0.854
MTND2P40	-0.411	0.153	-2.686	0.007	0.663	0.102	-3.323	0.001	0.491	0.895
AC010422.4	-0.499	0.153	-3.261	0.001	0.607	0.093	-4.229	0	0.45	0.819
GET3	0.486	0.154	3.162	0.002	1.626	0.25	2.504	0.012	1.203	2.197
BEST2	0.506	0.154	3.295	0.001	1.659	0.255	2.586	0.01	1.228	2.241
SYCE2	-0.481	0.153	-3.137	0.002	0.618	0.095	-4.028	0	0.458	0.835
AC008569.2	-0.457	0.153	-2.991	0.003	0.633	0.097	-3.791	0	0.47	0.854
SYDE1	0.401	0.153	2.622	0.009	1.493	0.228	2.161	0.031	1.106	2.014
AC006128.1	-0.588	0.153	-3.84	0	0.555	0.085	-5.228	0	0.411	0.75
CYP4F23P	-0.445	0.153	-2.899	0.004	0.641	0.098	-3.651	0	0.475	0.866
CYP4F8	-0.395	0.152	-2.595	0.009	0.674	0.103	-3.182	0.001	0.5	0.908
CYP4F12	-0.498	0.153	-3.258	0.001	0.608	0.093	-4.223	0	0.45	0.82
HSH2D	-0.583	0.154	-3.791	0	0.558	0.086	-5.146	0	0.413	0.755
AC020917.4	-0.411	0.152	-2.699	0.007	0.663	0.101	-3.338	0.001	0.492	0.894
AC020917.1	-0.449	0.154	-2.917	0.004	0.638	0.098	-3.681	0	0.472	0.863
AC010319.4	-0.455	0.153	-2.982	0.003	0.634	0.097	-3.777	0	0.47	0.856
AC010618.2	-0.409	0.153	-2.674	0.007	0.665	0.102	-3.303	0.001	0.493	0.897
COLGALT1	0.487	0.154	3.16	0.002	1.628	0.251	2.501	0.012	1.203	2.202
INSL3	-0.491	0.155	-3.168	0.002	0.612	0.095	-4.09	0	0.452	0.829
ARRDC2	-0.558	0.154	-3.617	0	0.572	0.088	-4.845	0	0.423	0.774
COMP	0.431	0.155	2.781	0.005	1.539	0.239	2.259	0.024	1.136	2.085
HOMER3-AS1	-0.48	0.153	-3.136	0.002	0.619	0.095	-4.026	0	0.458	0.835
AC002306.1	-0.557	0.154	-3.61	0	0.573	0.088	-4.83	0	0.424	0.775
ZNF506	-0.409	0.153	-2.68	0.007	0.664	0.101	-3.31	0.001	0.493	0.896
AC011477.1	-0.483	0.153	-3.151	0.002	0.617	0.095	-4.05	0	0.457	0.833
MIR1270	-0.426	0.152	-2.799	0.005	0.653	0.099	-3.49	0	0.485	0.88
ZNF493	-0.394	0.152	-2.595	0.009	0.674	0.102	-3.181	0.001	0.5	0.908
ZNF43	-0.432	0.152	-2.842	0.004	0.649	0.099	-3.555	0	0.482	0.874
IPO5P1	-0.46	0.153	-2.999	0.003	0.631	0.097	-3.808	0	0.467	0.853
ZNF91	-0.446	0.152	-2.934	0.003	0.64	0.097	-3.698	0	0.475	0.862
AC010300.1	-0.432	0.153	-2.829	0.005	0.649	0.099	-3.539	0	0.481	0.876
ZNF254	-0.442	0.153	-2.89	0.004	0.643	0.098	-3.634	0	0.476	0.867
AC073534.2	-0.404	0.152	-2.65	0.008	0.668	0.102	-3.266	0.001	0.495	0.9
PLEKHF1	-0.432	0.153	-2.827	0.005	0.649	0.099	-3.537	0	0.481	0.876
TSHZ3	0.462	0.153	3.008	0.003	1.587	0.244	2.409	0.016	1.174	2.144
AC008736.2	-0.424	0.152	-2.787	0.005	0.654	0.1	-3.472	0.001	0.485	0.882
SLC7A9	-0.486	0.153	-3.169	0.002	0.615	0.094	-4.081	0	0.455	0.831
ZNF302	-0.437	0.152	-2.876	0.004	0.646	0.098	-3.607	0	0.479	0.87
AC002128.1	-0.525	0.153	-3.437	0.001	0.592	0.09	-4.519	0	0.439	0.798
AC002511.2	-0.43	0.153	-2.808	0.005	0.65	0.1	-3.509	0	0.482	0.878
U2AF1L4	-0.465	0.152	-3.047	0.002	0.628	0.096	-3.879	0	0.466	0.847
AD000671.3	-0.534	0.154	-3.462	0.001	0.586	0.09	-4.575	0	0.433	0.793
HSPB6	0.702	0.157	4.473	0	2.018	0.317	3.213	0.001	1.484	2.745
APLP1	0.478	0.155	3.075	0.002	1.613	0.251	2.444	0.015	1.189	2.187
AC092296.2	-0.481	0.153	-3.147	0.002	0.618	0.094	-4.042	0	0.458	0.834
ZFP14	-0.539	0.153	-3.532	0	0.583	0.089	-4.681	0	0.433	0.787
ZNF383	-0.441	0.152	-2.904	0.004	0.643	0.098	-3.649	0	0.478	0.867
AC008806.1	-0.444	0.153	-2.902	0.004	0.642	0.098	-3.653	0	0.476	0.866
ZNF571-AS1	-0.577	0.153	-3.767	0	0.562	0.086	-5.096	0	0.416	0.758
CATSPERG	-0.477	0.153	-3.12	0.002	0.62	0.095	-3.999	0	0.46	0.837
ZNF546	-0.543	0.153	-3.544	0	0.581	0.089	-4.707	0	0.43	0.784
ZNF780B	-0.408	0.152	-2.685	0.007	0.665	0.101	-3.316	0.001	0.493	0.896
RAB4B	-0.503	0.154	-3.269	0.001	0.605	0.093	-4.247	0	0.448	0.818
B9D2	-0.416	0.153	-2.721	0.007	0.66	0.101	-3.375	0.001	0.489	0.89
DEDD2	-0.597	0.154	-3.873	0	0.55	0.085	-5.297	0	0.407	0.745
SRRM5	-0.415	0.152	-2.726	0.006	0.661	0.1	-3.378	0.001	0.49	0.89
ZNF230	-0.505	0.152	-3.311	0.001	0.604	0.092	-4.307	0	0.448	0.814
ZNF224	-0.492	0.153	-3.22	0.001	0.611	0.093	-4.16	0	0.453	0.825
ZNF226	-0.457	0.152	-3.002	0.003	0.633	0.096	-3.806	0	0.47	0.853
CEACAM22P	-0.421	0.153	-2.759	0.006	0.656	0.1	-3.432	0.001	0.486	0.885
PVR	0.442	0.153	2.893	0.004	1.556	0.238	2.338	0.019	1.153	2.1
AC011481.2	-0.4	0.153	-2.612	0.009	0.67	0.103	-3.212	0.001	0.497	0.905
CLASRP	-0.436	0.153	-2.853	0.004	0.647	0.099	-3.577	0	0.479	0.872
RNU6-611P	-0.479	0.152	-3.142	0.002	0.619	0.094	-4.03	0	0.459	0.835
ZNF296	-0.438	0.152	-2.874	0.004	0.645	0.098	-3.607	0	0.479	0.87
GEMIN7-AS1	-0.416	0.152	-2.733	0.006	0.66	0.1	-3.389	0.001	0.489	0.889
GEMIN7	-0.402	0.152	-2.646	0.008	0.669	0.102	-3.258	0.001	0.497	0.901
PPP1R37	-0.401	0.153	-2.621	0.009	0.669	0.103	-3.225	0.001	0.496	0.904
GPR4	0.411	0.152	2.699	0.007	1.509	0.23	2.213	0.027	1.119	2.034
AC007785.3	-0.413	0.153	-2.707	0.007	0.662	0.101	-3.351	0.001	0.491	0.892
MIR320E	-0.604	0.155	-3.909	0	0.546	0.084	-5.369	0	0.404	0.74
AC073548.1	-0.45	0.153	-2.947	0.003	0.638	0.097	-3.722	0	0.473	0.86
AC010331.1	-0.555	0.154	-3.598	0	0.574	0.089	-4.811	0	0.424	0.777
CYTH2	-0.437	0.153	-2.848	0.004	0.646	0.099	-3.572	0	0.478	0.873
AC026803.2	-0.477	0.153	-3.124	0.002	0.62	0.095	-4.004	0	0.46	0.837
AC010643.1	-0.512	0.155	-3.312	0.001	0.599	0.093	-4.327	0	0.442	0.811
MED25	-0.397	0.152	-2.606	0.009	0.672	0.102	-3.2	0.001	0.499	0.906
PTOV1-AS2	-0.558	0.153	-3.642	0	0.572	0.088	-4.877	0	0.424	0.773
VRK3	-0.406	0.152	-2.67	0.008	0.666	0.101	-3.293	0.001	0.495	0.898
AC008655.2	-0.434	0.152	-2.846	0.004	0.648	0.099	-3.563	0	0.481	0.874
SHANK1	0.409	0.155	2.641	0.008	1.505	0.233	2.168	0.03	1.111	2.038
KLK5	0.598	0.154	3.882	0	1.819	0.28	2.921	0.003	1.345	2.461
KLK6	0.484	0.153	3.168	0.002	1.623	0.248	2.511	0.012	1.203	2.189
KLK8	0.466	0.152	3.06	0.002	1.594	0.243	2.445	0.014	1.183	2.15
ZNF350	-0.421	0.152	-2.766	0.006	0.656	0.1	-3.44	0.001	0.487	0.885
AC011468.1	-0.424	0.153	-2.776	0.006	0.655	0.1	-3.457	0.001	0.485	0.883
ZNF841	-0.444	0.152	-2.91	0.004	0.642	0.098	-3.662	0	0.476	0.865
ZNF137P	-0.401	0.152	-2.638	0.008	0.67	0.102	-3.245	0.001	0.497	0.902
ZNF83	-0.494	0.153	-3.232	0.001	0.61	0.093	-4.18	0	0.452	0.823
AC022150.2	-0.428	0.152	-2.813	0.005	0.652	0.099	-3.511	0	0.484	0.878
ZNF600	-0.495	0.153	-3.24	0.001	0.61	0.093	-4.192	0	0.452	0.822
ZNF160	-0.434	0.153	-2.843	0.004	0.648	0.099	-3.559	0	0.48	0.874
AC245884.10	-0.434	0.152	-2.856	0.004	0.648	0.099	-3.577	0	0.481	0.873
AC245884.8	-0.491	0.153	-3.21	0.001	0.612	0.094	-4.144	0	0.454	0.826
LENG8	-0.469	0.152	-3.081	0.002	0.626	0.095	-3.93	0	0.464	0.843
KIR2DS4	-0.435	0.153	-2.848	0.004	0.647	0.099	-3.568	0	0.48	0.873
RDH13	-0.396	0.152	-2.596	0.009	0.673	0.103	-3.185	0.001	0.499	0.908
FIZ1	-0.452	0.152	-2.965	0.003	0.637	0.097	-3.748	0	0.472	0.858
ZNF524	-0.473	0.153	-3.084	0.002	0.623	0.096	-3.943	0	0.462	0.842
ZNF784	-0.45	0.153	-2.949	0.003	0.638	0.097	-3.725	0	0.473	0.86
ZSCAN5DP	-0.408	0.153	-2.668	0.008	0.665	0.102	-3.294	0.001	0.493	0.897
AC005498.1	-0.398	0.153	-2.609	0.009	0.671	0.102	-3.206	0.001	0.498	0.906
ZNF470	-0.407	0.152	-2.679	0.007	0.665	0.101	-3.307	0.001	0.494	0.896
AC005261.3	-0.466	0.153	-3.054	0.002	0.628	0.096	-3.89	0	0.465	0.846
ZNF460-AS1	-0.569	0.154	-3.705	0	0.566	0.087	-4.991	0	0.419	0.765
AC005261.1	-0.544	0.153	-3.553	0	0.58	0.089	-4.722	0	0.43	0.783
AC004076.2	-0.576	0.155	-3.727	0	0.562	0.087	-5.041	0	0.415	0.761
ZNF814	-0.543	0.155	-3.507	0	0.581	0.09	-4.658	0	0.429	0.787
AC010326.3	-0.402	0.153	-2.629	0.009	0.669	0.102	-3.235	0.001	0.496	0.903
AC010326.4	-0.454	0.154	-2.955	0.003	0.635	0.098	-3.74	0	0.47	0.858
AC020915.2	-0.557	0.154	-3.621	0	0.573	0.088	-4.845	0	0.424	0.775
MZF1	-0.48	0.154	-3.126	0.002	0.619	0.095	-4.013	0	0.458	0.836
SIRPG-AS1	-0.402	0.152	-2.645	0.008	0.669	0.102	-3.255	0.001	0.497	0.901
AL121899.1	-0.408	0.153	-2.675	0.007	0.665	0.101	-3.304	0.001	0.493	0.897
ADRA1D	0.433	0.153	2.838	0.005	1.542	0.235	2.304	0.021	1.143	2.079
SLC23A2	-0.498	0.155	-3.213	0.001	0.608	0.094	-4.165	0	0.448	0.823
RNA5SP474	-0.4	0.152	-2.623	0.009	0.67	0.102	-3.225	0.001	0.497	0.904
SHLD1	-0.52	0.154	-3.388	0.001	0.594	0.091	-4.443	0	0.44	0.803
DSTN	0.45	0.153	2.936	0.003	1.568	0.24	2.365	0.018	1.161	2.116
RRBP1	0.435	0.154	2.825	0.005	1.544	0.238	2.291	0.022	1.142	2.088
LINC00653	-0.474	0.153	-3.102	0.002	0.623	0.095	-3.968	0	0.461	0.84
SLC24A3	0.411	0.153	2.678	0.007	1.508	0.231	2.196	0.028	1.116	2.037
CST3	-0.412	0.154	-2.671	0.008	0.663	0.102	-3.305	0.001	0.49	0.896
SYNDIG1	0.401	0.154	2.601	0.009	1.493	0.23	2.143	0.032	1.104	2.02
AL035252.4	-0.59	0.155	-3.805	0	0.554	0.086	-5.187	0	0.409	0.751
AL121723.1	-0.458	0.156	-2.929	0.003	0.633	0.099	-3.715	0	0.466	0.859
NOL4L	-0.511	0.154	-3.307	0.001	0.6	0.093	-4.317	0	0.443	0.812
C20orf203	-0.415	0.153	-2.722	0.006	0.66	0.101	-3.374	0.001	0.49	0.89
FER1L4	-0.54	0.155	-3.486	0	0.583	0.09	-4.622	0	0.43	0.789
RPL37P1	-0.561	0.155	-3.609	0	0.571	0.089	-4.839	0	0.421	0.774
SPAG4	-0.523	0.156	-3.364	0.001	0.593	0.092	-4.42	0	0.437	0.804
RPN2	0.485	0.154	3.151	0.002	1.624	0.25	2.497	0.013	1.201	2.195
SRC	-0.501	0.153	-3.264	0.001	0.606	0.093	-4.236	0	0.449	0.819
ZHX3	0.598	0.156	3.835	0	1.818	0.283	2.887	0.004	1.339	2.467
L3MBTL1	-0.506	0.153	-3.313	0.001	0.603	0.092	-4.314	0	0.447	0.813
SGK2	-0.427	0.153	-2.792	0.005	0.653	0.1	-3.482	0	0.484	0.881
OSER1-DT	-0.401	0.152	-2.638	0.008	0.67	0.102	-3.245	0.001	0.497	0.902
AL034418.1	-0.445	0.152	-2.933	0.003	0.641	0.097	-3.694	0	0.476	0.863
KCNB1	0.508	0.153	3.317	0.001	1.662	0.254	2.601	0.009	1.231	2.243
PTGIS	0.517	0.155	3.328	0.001	1.677	0.261	2.598	0.009	1.237	2.275
PMEPA1	0.514	0.156	3.3	0.001	1.672	0.26	2.58	0.01	1.232	2.268
STX16-NPEPL1	-0.617	0.154	-3.993	0	0.54	0.083	-5.521	0	0.399	0.731
AL139349.1	-0.501	0.153	-3.273	0.001	0.606	0.093	-4.249	0	0.449	0.818
AL132655.2	-0.454	0.152	-2.982	0.003	0.635	0.097	-3.775	0	0.471	0.856
RBBP8NL	-0.462	0.154	-2.996	0.003	0.63	0.097	-3.807	0	0.466	0.852
AL357033.4	-0.496	0.153	-3.233	0.001	0.609	0.093	-4.186	0	0.451	0.822
OGFR-AS1	-0.517	0.154	-3.354	0.001	0.596	0.092	-4.392	0	0.441	0.807
DNAJC5	0.437	0.154	2.843	0.004	1.549	0.238	2.303	0.021	1.145	2.094
MIR647	-0.429	0.152	-2.818	0.005	0.651	0.099	-3.518	0	0.484	0.878
C20orf204	-0.401	0.152	-2.636	0.008	0.67	0.102	-3.242	0.001	0.497	0.902
RGS19	0.424	0.153	2.775	0.006	1.528	0.234	2.261	0.024	1.133	2.062
MIR99AHG	0.471	0.154	3.056	0.002	1.602	0.247	2.437	0.015	1.184	2.167
APP	0.449	0.153	2.933	0.003	1.567	0.24	2.362	0.018	1.161	2.117
AF129075.2	-0.491	0.153	-3.203	0.001	0.612	0.094	-4.136	0	0.453	0.826
AP000254.2	-0.474	0.153	-3.093	0.002	0.623	0.095	-3.957	0	0.461	0.841
LINC00649	-0.507	0.154	-3.3	0.001	0.602	0.093	-4.299	0	0.446	0.814
AP000697.1	-0.437	0.153	-2.853	0.004	0.646	0.099	-3.578	0	0.479	0.872
AP001437.1	-0.406	0.153	-2.659	0.008	0.666	0.102	-3.28	0.001	0.494	0.899
AF064861.1	-0.45	0.153	-2.943	0.003	0.637	0.098	-3.718	0	0.472	0.86
TRPM2	-0.448	0.154	-2.914	0.004	0.639	0.098	-3.676	0	0.473	0.864
LSS	0.518	0.154	3.364	0.001	1.678	0.258	2.626	0.009	1.241	2.27
AC008079.1	-0.46	0.153	-3.009	0.003	0.632	0.096	-3.82	0	0.468	0.852
TSSK1A	-0.404	0.153	-2.646	0.008	0.668	0.102	-3.261	0.001	0.495	0.901
ESS2	-0.438	0.153	-2.872	0.004	0.645	0.098	-3.605	0	0.478	0.87
LINC01311	-0.545	0.154	-3.543	0	0.58	0.089	-4.71	0	0.429	0.784
AC006547.1	-0.405	0.152	-2.656	0.008	0.667	0.102	-3.273	0.001	0.495	0.899
SCARF2	0.412	0.155	2.662	0.008	1.51	0.234	2.182	0.029	1.115	2.045
AIFM3	-0.524	0.154	-3.402	0.001	0.592	0.091	-4.472	0	0.438	0.801
YDJC	-0.437	0.153	-2.856	0.004	0.646	0.099	-3.582	0	0.478	0.872
AC245060.5	-0.517	0.153	-3.383	0.001	0.596	0.091	-4.431	0	0.442	0.804
DRICH1	-0.41	0.152	-2.696	0.007	0.663	0.101	-3.334	0.001	0.492	0.894
AP000346.1	-0.52	0.153	-3.404	0.001	0.594	0.091	-4.466	0	0.44	0.802
GUSBP11	-0.619	0.154	-4.019	0	0.538	0.083	-5.565	0	0.398	0.728
AP000347.1	-0.405	0.152	-2.662	0.008	0.667	0.102	-3.283	0.001	0.495	0.899
MIF-AS1	-0.414	0.153	-2.712	0.007	0.661	0.101	-3.36	0.001	0.49	0.892
AC253536.6	-0.459	0.153	-3.009	0.003	0.632	0.096	-3.819	0	0.468	0.852
AL022324.1	-0.516	0.154	-3.357	0.001	0.597	0.092	-4.394	0	0.441	0.807
AL022324.2	-0.444	0.153	-2.904	0.004	0.642	0.098	-3.656	0	0.476	0.866
LRP5L	-0.594	0.154	-3.865	0	0.552	0.085	-5.279	0	0.408	0.746
YES1P1	-0.446	0.153	-2.92	0.003	0.64	0.098	-3.681	0	0.474	0.864
TTC28-AS1	-0.462	0.153	-3.026	0.002	0.63	0.096	-3.847	0	0.467	0.85
AC002059.1	-0.419	0.153	-2.744	0.006	0.658	0.1	-3.408	0.001	0.488	0.887
AC002059.2	-0.47	0.153	-3.069	0.002	0.625	0.096	-3.918	0	0.463	0.844
AC003681.1	-0.444	0.152	-2.916	0.004	0.641	0.098	-3.671	0	0.476	0.865
AC004264.1	-0.454	0.153	-2.967	0.003	0.635	0.097	-3.754	0	0.471	0.857
AC003072.1	-0.418	0.153	-2.732	0.006	0.658	0.101	-3.391	0.001	0.488	0.889
EIF4HP2	-0.519	0.153	-3.396	0.001	0.595	0.091	-4.452	0	0.441	0.803
MORC2-AS1	-0.395	0.152	-2.603	0.009	0.673	0.102	-3.193	0.001	0.5	0.907
PATZ1	-0.536	0.154	-3.485	0	0.585	0.09	-4.611	0	0.433	0.791
SFI1	-0.43	0.152	-2.819	0.005	0.651	0.099	-3.523	0	0.482	0.877
PISD	-0.413	0.152	-2.715	0.007	0.662	0.101	-3.361	0.001	0.491	0.892
DEPDC5	-0.581	0.153	-3.79	0	0.559	0.086	-5.141	0	0.414	0.755
RFPL3S	-0.628	0.155	-4.062	0	0.534	0.083	-5.653	0	0.394	0.722
APOL4	-0.58	0.155	-3.745	0	0.56	0.087	-5.076	0	0.413	0.758
APOL2	-0.603	0.154	-3.908	0	0.547	0.084	-5.365	0	0.404	0.74
APOL1	-0.507	0.154	-3.279	0.001	0.603	0.093	-4.269	0	0.445	0.816
MIR6819	-0.621	0.154	-4.026	0	0.538	0.083	-5.58	0	0.397	0.727
TST	-0.486	0.155	-3.142	0.002	0.615	0.095	-4.045	0	0.455	0.833
TMPRSS6	-0.531	0.153	-3.462	0.001	0.588	0.09	-4.568	0	0.435	0.794
SLC16A8	-0.461	0.153	-3.014	0.003	0.631	0.096	-3.829	0	0.467	0.851
AL022322.1	-0.638	0.155	-4.126	0	0.528	0.082	-5.773	0	0.39	0.715
PLA2G6	-0.463	0.154	-3.013	0.003	0.629	0.097	-3.833	0	0.465	0.85
CSNK1E	-0.43	0.153	-2.808	0.005	0.65	0.1	-3.508	0	0.482	0.878
TPTEP2	-0.422	0.153	-2.768	0.006	0.655	0.1	-3.445	0.001	0.486	0.884
AL021707.5	-0.407	0.153	-2.665	0.008	0.666	0.102	-3.289	0.001	0.493	0.898
AL021707.8	-0.633	0.155	-4.087	0	0.531	0.082	-5.702	0	0.392	0.719
AL021707.1	-0.433	0.152	-2.846	0.004	0.648	0.099	-3.563	0	0.481	0.874
AL021707.7	-0.492	0.153	-3.225	0.001	0.611	0.093	-4.166	0	0.453	0.824
APOBEC3D	-0.496	0.154	-3.226	0.001	0.609	0.094	-4.176	0	0.451	0.823
APOBEC3H	-0.6	0.154	-3.902	0	0.549	0.084	-5.347	0	0.406	0.742
SNORD83A	-0.409	0.152	-2.685	0.007	0.665	0.101	-3.316	0.001	0.493	0.896
AL080243.4	-0.404	0.155	-2.614	0.009	0.668	0.103	-3.221	0.001	0.493	0.904
WBP2NL	-0.427	0.152	-2.807	0.005	0.652	0.099	-3.503	0	0.484	0.879
SLC25A5P1	-0.58	0.154	-3.761	0	0.56	0.086	-5.098	0	0.414	0.757
AL021878.2	-0.453	0.152	-2.977	0.003	0.636	0.097	-3.766	0	0.472	0.857
CYP2D8P	-0.41	0.152	-2.697	0.007	0.664	0.101	-3.334	0.001	0.493	0.894
AL022316.1	-0.465	0.153	-3.04	0.002	0.628	0.096	-3.871	0	0.465	0.848
ATP5MGL	-0.423	0.152	-2.78	0.005	0.655	0.1	-3.461	0.001	0.486	0.883
SHISAL1	0.523	0.154	3.392	0.001	1.687	0.26	2.642	0.008	1.247	2.282
Z95331.1	-0.396	0.152	-2.607	0.009	0.673	0.102	-3.199	0.001	0.5	0.906
CERK	0.423	0.152	2.778	0.005	1.527	0.233	2.265	0.024	1.133	2.059
AL022328.1	-0.462	0.153	-3.024	0.002	0.63	0.096	-3.843	0	0.467	0.85
AL022328.2	-0.451	0.153	-2.948	0.003	0.637	0.097	-3.724	0	0.472	0.86
CPT1B	-0.489	0.153	-3.196	0.001	0.613	0.094	-4.122	0	0.455	0.828
CHKB-CPT1B	-0.55	0.153	-3.59	0	0.577	0.088	-4.787	0	0.427	0.779
PPP2R3B	-0.56	0.154	-3.628	0	0.571	0.088	-4.862	0	0.422	0.773
AKAP17A	-0.531	0.154	-3.457	0.001	0.588	0.09	-4.561	0	0.435	0.795
EGFL6	-0.419	0.152	-2.754	0.006	0.658	0.1	-3.42	0.001	0.488	0.886
OFD1	-0.613	0.154	-3.98	0	0.541	0.083	-5.494	0	0.4	0.732
CTPS2	-0.407	0.153	-2.656	0.008	0.666	0.102	-3.278	0.001	0.493	0.899
RS1	-0.434	0.154	-2.822	0.005	0.648	0.1	-3.533	0	0.479	0.876
PCYT1B	0.401	0.153	2.623	0.009	1.493	0.228	2.161	0.031	1.107	2.015
BX842568.2	-0.41	0.152	-2.692	0.007	0.663	0.101	-3.329	0.001	0.492	0.894
BX842568.3	-0.44	0.153	-2.878	0.004	0.644	0.099	-3.615	0	0.477	0.869
MID1IP1	-0.413	0.153	-2.708	0.007	0.662	0.101	-3.353	0.001	0.491	0.892
CXorf38	-0.729	0.157	-4.644	0	0.482	0.076	-6.836	0	0.354	0.656
FUNDC1	-0.41	0.153	-2.681	0.007	0.664	0.101	-3.314	0.001	0.492	0.896
ZNF674	-0.404	0.152	-2.662	0.008	0.667	0.101	-3.281	0.001	0.496	0.899
RNU6-50P	-0.431	0.153	-2.81	0.005	0.65	0.1	-3.514	0	0.481	0.878
AL512633.1	-0.494	0.153	-3.224	0.001	0.61	0.094	-4.17	0	0.452	0.824
INE1	-0.409	0.152	-2.687	0.007	0.664	0.101	-3.32	0.001	0.493	0.895
ZNF630	-0.483	0.153	-3.152	0.002	0.617	0.095	-4.051	0	0.457	0.833
TIMM17B	-0.415	0.153	-2.711	0.007	0.661	0.101	-3.36	0.001	0.49	0.891
NUDT10	0.456	0.153	2.969	0.003	1.577	0.242	2.385	0.017	1.168	2.131
MTRNR2L10	-0.421	0.154	-2.739	0.006	0.656	0.101	-3.406	0.001	0.485	0.887
SPIN3	-0.402	0.152	-2.643	0.008	0.669	0.102	-3.252	0.001	0.497	0.901
FAAH2	-0.414	0.153	-2.711	0.007	0.661	0.101	-3.359	0.001	0.49	0.892
AL590762.2	-0.422	0.152	-2.773	0.006	0.655	0.1	-3.45	0.001	0.486	0.884
OGT	-0.484	0.152	-3.174	0.002	0.616	0.094	-4.082	0	0.457	0.831
GCNA	-0.571	0.154	-3.713	0	0.565	0.087	-5.007	0	0.418	0.764
PIN4	-0.468	0.153	-3.068	0.002	0.626	0.096	-3.913	0	0.464	0.844
PABPC1P3	-0.4	0.153	-2.615	0.009	0.67	0.103	-3.215	0.001	0.496	0.905
NEXMIF	0.458	0.154	2.976	0.003	1.581	0.243	2.388	0.017	1.169	2.137
ZDHHC15	0.454	0.154	2.954	0.003	1.575	0.242	2.375	0.018	1.165	2.128
COX7B	-0.474	0.154	-3.071	0.002	0.623	0.096	-3.929	0	0.46	0.842
KLHL4	0.473	0.155	3.057	0.002	1.604	0.248	2.436	0.015	1.185	2.172
NAP1L3	0.517	0.155	3.337	0.001	1.677	0.26	2.606	0.009	1.238	2.272
HNRNPA1P27	-0.416	0.153	-2.718	0.007	0.66	0.101	-3.371	0.001	0.488	0.89
TCEAL2	0.402	0.154	2.607	0.009	1.494	0.23	2.147	0.032	1.105	2.021
TCEAL5	0.452	0.154	2.939	0.003	1.571	0.242	2.365	0.018	1.162	2.123
RAB40A	-0.426	0.154	-2.767	0.006	0.653	0.1	-3.449	0.001	0.483	0.883
AC234782.2	-0.49	0.153	-3.209	0.001	0.613	0.094	-4.14	0	0.454	0.826
VSIG1	-0.419	0.153	-2.733	0.006	0.658	0.101	-3.394	0.001	0.487	0.888
CHRDL1	0.488	0.154	3.166	0.002	1.629	0.251	2.505	0.012	1.204	2.203
PLS3	0.451	0.153	2.946	0.003	1.57	0.241	2.371	0.018	1.163	2.12
KIAA1210	0.502	0.156	3.228	0.001	1.652	0.257	2.538	0.011	1.218	2.242
RNF113A	-0.445	0.153	-2.901	0.004	0.641	0.098	-3.654	0	0.474	0.866
RHOXF1	-0.482	0.153	-3.142	0.002	0.618	0.095	-4.036	0	0.458	0.834
AL023653.2	-0.417	0.153	-2.728	0.006	0.659	0.101	-3.384	0.001	0.489	0.889
SLC25A14	-0.534	0.153	-3.486	0	0.586	0.09	-4.608	0	0.434	0.791
HS6ST2	-0.457	0.153	-2.982	0.003	0.633	0.097	-3.78	0	0.469	0.855
INTS6L	-0.421	0.153	-2.747	0.006	0.657	0.101	-3.415	0.001	0.486	0.886
FHL1	0.561	0.154	3.637	0	1.752	0.27	2.783	0.005	1.295	2.37
MAP7D3	0.401	0.153	2.626	0.009	1.493	0.228	2.164	0.03	1.107	2.014
LINC00892	-0.415	0.152	-2.732	0.006	0.66	0.1	-3.386	0.001	0.49	0.889
RANP4	-0.486	0.153	-3.185	0.001	0.615	0.094	-4.102	0	0.456	0.829
AL683813.2	-0.465	0.153	-3.042	0.002	0.628	0.096	-3.874	0	0.465	0.847
IDSP1	-0.46	0.153	-2.999	0.003	0.631	0.097	-3.809	0	0.467	0.853
LINC00893	-0.403	0.152	-2.652	0.008	0.668	0.102	-3.266	0.001	0.496	0.9
AJ271736.1	-0.441	0.153	-2.883	0.004	0.643	0.098	-3.625	0	0.476	0.868
AC006157.1	-0.408	0.153	-2.672	0.008	0.665	0.102	-3.299	0.001	0.493	0.897
